# Supplementary material for: GNE: a deep learning framework for gene network inference by aggregating biological information
Source: BMC Syst Biol. 2019 Apr 5;13(Suppl 2):38. doi: 10.1186/s12918-019-0694-y (PMC6449883; doi:10.1186/s12918-019-0694-y)
Supplement: Supplementary file 1 — Table S1. Includes yeast gene pairs predicted by GNE with probabilities of 0.5 or higher. (XLSX 109 kb) [file 12918_2019_694_MOESM1_ESM.xlsx]

## Sheet: yeast_common_neighbors for fals
Table S1: Yeast Gene pairs predicted by GNE with probabilities of 0.5 or higher. Number of Common neighbors is the number of shared interacting genes between a gene pair. Rows marked with yellow color indicate predicted interaction is true based on latest version 3.4.162 of BioGRID interaction dataset released on June 2018.
Gene A	Gene B	Probability	True interaction	Number of common neighbors
YBR160W	YDR016C	0.9936	1	169
YDL008W	YHR030C	0.99325	0	164
YGR195W	YPL190C	0.99268	0	80
YMR186W	YBR231C	0.99127	0	247
YKL024C	YDR182W	0.99086	1	83
YNL262W	YER094C	0.98992	1	94
YDL116W	YPL241C	0.98915	0	64
YGL113W	YDL147W	0.98624	0	72
YGR277C	YDR238C	0.9861	0	70
YLR298C	YER009W	0.98595	0	129
YDR398W	YPR161C	0.98504	0	108
YDR288W	YDR021W	0.98469	0	52
YGR092W	YLR200W	0.98165	0	242
YGR092W	YLR200W	0.98165	1	242
YDL102W	YGR188C	0.98155	0	196
YGR006W	YPL007C	0.98114	0	44
YIL021W	YHR205W	0.98091	0	188
YCL032W	YJL101C	0.97882	0	85
YGL219C	YMR281W	0.97876	0	52
YCL032W	YDL035C	0.97837	0	126
YLR087C	YMR216C	0.97828	0	113
YGL061C	YIL021W	0.97824	0	131
YGL173C	YDR145W	0.97732	1	195
YCR094W	YGR157W	0.97708	1	114
YGR183C	YML105C	0.97694	1	30
YKL139W	YOR250C	0.97687	0	130
YKL069W	YJL029C	0.97664	0	76
YGL233W	YDR137W	0.9764	0	74
YDL156W	YOR254C	0.97598	0	82
YAR014C	YMR281W	0.97552	0	42
YJL203W	YBR193C	0.97447	0	82
YOR250C	YGR156W	0.97445	0	98
YER122C	YCR032W	0.97413	1	42
YML103C	YFR050C	0.97381	0	131
YGL168W	YCL032W	0.97332	1	151
YDR159W	YDL126C	0.97322	0	269
YDL145C	YDR016C	0.97269	0	103
YOL006C	YOR330C	0.97234	0	47
YGL203C	YGL124C	0.97193	0	45
YDR510W	YDL098C	0.97152	0	48
YJR093C	YJL054W	0.97133	0	60
YGR188C	YEL018W	0.97097	1	130
YDL100C	YCR034W	0.97073	0	87
YLR086W	YNL136W	0.9704	0	92
YNL088W	YDL006W	0.96993	0	65
YOR249C	YLR079W	0.96962	0	158
YGR188C	YLR089C	0.96958	0	115
YDL006W	YER168C	0.96947	0	62
YKL018W	YLL002W	0.96936	0	55
YJR073C	YIR006C	0.96901	0	162
YPL211W	YDR449C	0.9689	0	36
YLR383W	YOR259C	0.96848	0	65
YDR311W	YGL122C	0.96796	0	374
YGR105W	YGR002C	0.96765	0	230
YER093C	YNL080C	0.96721	1	146
YNL282W	YMR112C	0.96652	0	64
YGR252W	YDR159W	0.96615	0	191
YOR117W	YGL247W	0.96581	0	90
YFL037W	YDR060W	0.96562	0	77
YGL212W	YHR021C	0.96492	0	82
YML028W	YJR073C	0.96434	1	111
YJR057W	YLR103C	0.96405	0	101
YLR418C	YDL148C	0.96373	1	90
YLR116W	YPR183W	0.9634	0	65
YJL179W	YER157W	0.96301	0	102
YDR236C	YNL061W	0.96239	0	73
YEL034W	YCR009C	0.96175	1	254
YPL069C	YNL067W	0.96164	0	70
YLR315W	YJR084W	0.96157	0	63
YPL051W	YOR326W	0.96153	0	97
YAR014C	YJL148W	0.96118	0	67
YDR138W	YBR095C	0.96115	0	38
YLR371W	YLL002W	0.96081	1	146
YCR009C	YBR167C	0.96055	0	138
YOR068C	YMR112C	0.95986	0	51
YOR294W	YHR065C	0.95945	0	22
YER155C	YDR224C	0.95902	0	88
YHR081W	YDL147W	0.95876	0	91
YDR082W	YNR010W	0.95794	0	51
YER092W	YPL153C	0.95783	0	110
YOR151C	YJR065C	0.95765	0	95
YMR268C	YER136W	0.95761	0	56
YGL130W	YGL016W	0.95731	0	78
YMR239C	YLL011W	0.95696	0	43
YOR250C	YJL125C	0.95689	0	52
YDR146C	YOR132W	0.95667	0	86
YKL073W	YOR070C	0.95666	0	94
YOR216C	YHR036W	0.95665	0	222
YOR216C	YHR036W	0.95665	1	222
YMR060C	YDR315C	0.95635	0	67
YDL164C	YPR070W	0.95572	0	88
YML065W	YCL005W-A	0.95505	0	66
YGR179C	YNR010W	0.95504	0	120
YDR331W	YBR161W	0.95503	0	47
YIL084C	YCL037C	0.95423	0	179
YPL010W	YDR373W	0.95416	0	54
YPR190C	YDR195W	0.95389	0	62
YML105C	YKL048C	0.95374	0	70
YGR274C	YIL021W	0.95342	0	176
YCR052W	YBR278W	0.95331	1	59
YJR045C	YNL330C	0.95312	0	217
YDR127W	YML121W	0.95298	1	101
YDR227W	YHR191C	0.95263	0	49
YNL215W	YJL183W	0.95183	1	101
YOR008C	YLR085C	0.95141	0	42
YKL045W	YLR039C	0.9514	0	68
YMR186W	YJR125C	0.9509	0	89
YLR089C	YMR043W	0.95058	0	58
YNL081C	YER086W	0.95008	0	20
YJR093C	YDL111C	0.94999	0	57
YBR070C	YMR186W	0.94979	0	96
YBR111W-A	YNL243W	0.94944	0	126
YGR006W	YDL148C	0.94862	0	52
YLR222C	YOR294W	0.94762	0	31
YML098W	YBR087W	0.94664	0	72
YKL042W	YDR172W	0.9465	0	95
YHR200W	YMR268C	0.94633	0	103
YDR045C	YJR082C	0.94625	0	44
YOR189W	YMR186W	0.94607	0	88
YCL028W	YDR138W	0.94568	0	18
YMR284W	YAR014C	0.94548	0	43
YDL217C	YLR393W	0.94513	0	77
YJR093C	YML126C	0.94378	0	75
YMR117C	YDR164C	0.94349	0	58
YJL115W	YNL041C	0.94331	0	136
YLR096W	YOR122C	0.94323	0	54
YHR119W	YIR008C	0.94297	1	90
YMR060C	YDR369C	0.94276	0	60
YLR386W	YGR119C	0.94271	0	58
YDR510W	YDR382W	0.94263	0	76
YFR052W	YHR178W	0.94187	1	121
YDR356W	YBR198C	0.9418	0	99
YLR360W	YNL084C	0.94168	0	69
YCR002C	YNR053C	0.94162	0	88
YNL004W	YOR362C	0.94081	0	35
YBR156C	YNL298W	0.94078	0	97
YDR188W	YBL020W	0.9407	0	114
YAL010C	YGR229C	0.94055	0	82
YFL002C	YDL102W	0.94027	0	143
YOR249C	YGL207W	0.94018	0	90
YPL020C	YHL020C	0.94005	0	47
YPL069C	YJR141W	0.9397	0	109
YOR123C	YDR189W	0.93948	0	82
YPR120C	YJL128C	0.9392	0	61
YKL059C	YJL034W	0.9386	0	46
YIL033C	YFR010W	0.93859	0	97
YJR054W	YGL066W	0.93806	0	76
YCL032W	YPR181C	0.93783	0	112
YOR026W	YMR201C	0.93753	0	79
YPL013C	YJR089W	0.93749	0	36
YLR015W	YDR331W	0.93734	0	120
YAR007C	YBL031W	0.93665	0	32
YJL029C	YMR213W	0.93657	0	64
YJL031C	YDL143W	0.9364	1	87
YCR053W	YPR089W	0.93633	0	61
YBR175W	YLR032W	0.93567	1	68
YPL124W	YAR002W	0.93534	0	48
YBR070C	YPR162C	0.93504	0	55
YOR358W	YLR052W	0.93478	1	61
YBL034C	YER110C	0.93449	0	92
YOR183W	YDR021W	0.93427	0	16
YPL047W	YFL034C-B	0.93415	0	217
YER092W	YEL013W	0.93388	0	81
YHL020C	YPR051W	0.93374	0	64
YGL215W	YDL033C	0.93359	0	46
YBL052C	YOL081W	0.93339	1	81
YOR123C	YGL167C	0.93303	0	156
YNL049C	YMR312W	0.93302	0	47
YJR093C	YGL151W	0.93287	0	84
YGR274C	YDL035C	0.93263	0	119
YLR119W	YGL255W	0.93224	0	40
YBL051C	YOL004W	0.93118	0	137
YDR372C	YBL017C	0.93061	1	42
YDR217C	YDR150W	0.93055	0	63
YER151C	YML103C	0.92983	0	219
YER151C	YML103C	0.92983	1	219
YGL012W	YCL037C	0.92971	0	73
YNL271C	YKR024C	0.92961	0	64
YNR041C	YDR062W	0.92956	0	49
YOR311C	YNL025C	0.92911	0	54
YNL243W	YDR448W	0.92831	0	82
YER157W	YOL145C	0.92826	0	83
YLL013C	YMR200W	0.92821	0	96
YJR002W	YJR123W	0.9278	0	20
YKL176C	YMR026C	0.9276	0	48
YBR109C	YHR135C	0.92723	0	118
YJL125C	YHR200W	0.92682	0	86
YNL061W	YGL001C	0.92666	0	94
YBR123C	YOR048C	0.92665	0	45
YPR182W	YEL020C	0.92645	0	44
YJR006W	YER178W	0.92635	1	65
YDR208W	YLR045C	0.92617	0	83
YOL135C	YDR146C	0.92605	0	79
YDL007W	YMR005W	0.92601	0	43
YAL024C	YOR048C	0.92597	0	87
YAL026C	YBL074C	0.92577	0	76
YCL052C	YCL032W	0.9253	0	48
YMR186W	YOR191W	0.92516	0	60
YNL252C	YGR195W	0.92494	0	46
YML128C	YLR360W	0.92484	0	100
YLR371W	YER061C	0.92466	0	108
YGR251W	YNL308C	0.92464	0	78
YPL233W	YDL220C	0.92431	0	97
YDR075W	YER092W	0.92427	0	81
YNL272C	YLL006W	0.92419	1	102
YOL018C	YER118C	0.92414	0	83
YIL021W	YJL138C	0.92347	1	70
YER161C	YBR102C	0.92306	0	50
YJL092W	YLR310C	0.92293	0	54
YKL144C	YHR167W	0.9229	0	62
YJR013W	YKL059C	0.92239	0	22
YFR050C	YGR281W	0.92205	0	51
YPL018W	YPL020C	0.92201	0	56
YNL002C	YLR222C	0.9219	0	50
YIL027C	YML094W	0.92148	0	37
YOR224C	YGR270W	0.92106	0	61
YHR164C	YBL016W	0.92102	0	99
YBR002C	YHL023C	0.92094	0	46
YDR146C	YKL206C	0.92034	0	37
YOR039W	YGR174C	0.92012	0	60
YOR048C	YKR082W	0.92003	0	96
YGL173C	YML017W	0.92	0	90
YHR041C	YDR245W	0.91971	1	185
YHR154W	YER040W	0.91949	0	71
YJL011C	YBL052C	0.91943	0	19
YGL174W	YNL181W	0.91865	0	121
YML008C	YLR115W	0.91816	0	116
YMR076C	YDR363W-A	0.91739	0	86
YOR358W	YGL253W	0.91718	1	51
YOR089C	YPR191W	0.91625	0	64
YCR052W	YBR202W	0.91617	1	69
YOR326W	YMR240C	0.91561	0	46
YCR077C	YFL029C	0.91493	0	92
YHR067W	YGR081C	0.91488	0	56
YEL050C	YGL092W	0.91484	0	54
YBR118W	YJR136C	0.9145	0	23
YDR159W	YLR060W	0.91415	0	75
YMR078C	YDR532C	0.91384	0	53
YJL136C	YJR043C	0.91337	0	79
YLR417W	YAL026C	0.91328	0	35
YOR189W	YGR200C	0.91312	1	83
YBR103W	YDR087C	0.91296	1	72
YDR167W	YNL061W	0.91282	1	85
YBR102C	YDR167W	0.91217	0	42
YDR233C	YDR238C	0.91186	0	54
YDL020C	YDL226C	0.91137	0	80
YKR068C	YDR049W	0.91102	0	100
YEL003W	YPL231W	0.91092	0	79
YGL030W	YKL172W	0.91065	0	32
YAL040C	YJR066W	0.91021	0	61
YLR096W	YNL267W	0.90945	0	26
YCR034W	YBR030W	0.90924	0	28
YJL054W	YBR221C	0.90889	1	22
YLR021W	YIL150C	0.9086	0	45
YDR195W	YNL136W	0.90859	0	104
YKL095W	YDR404C	0.90845	0	42
YFL024C	YLR117C	0.9084	0	23
YIL030C	YLR418C	0.90761	1	65
YML126C	YAL038W	0.90749	0	41
YER052C	YCR009C	0.90738	0	86
YJL136C	YLL006W	0.90716	0	73
YBL074C	YBL035C	0.90711	0	54
YGR195W	YJL010C	0.90698	0	35
YGR211W	YIL160C	0.90682	0	22
YMR200W	YER012W	0.90648	1	38
YJL004C	YLR337C	0.90624	1	128
YDR432W	YJR139C	0.90623	0	117
YJR011C	YDL077C	0.90622	0	85
YOL135C	YNL273W	0.90606	0	72
YFR052W	YCL017C	0.9051	0	81
YDR457W	YPL226W	0.90493	1	128
YHR024C	YOR116C	0.9044	0	29
YNL199C	YDR254W	0.90434	0	48
YLR002C	YMR190C	0.90421	0	49
YDR356W	YLR089C	0.9041	0	45
YDL035C	YOR116C	0.90405	0	47
YIL039W	YNL051W	0.90394	0	82
YMR234W	YDR334W	0.90378	0	39
YDL098C	YLR039C	0.90362	0	93
YDL008W	YKL056C	0.90361	0	52
YMR275C	YLL036C	0.90312	0	39
YER157W	YPL042C	0.90265	0	119
YKL119C	YNL216W	0.90264	0	83
YNL294C	YNL273W	0.90245	0	69
YBR289W	YMR039C	0.90213	0	105
YLR340W	YNL207W	0.9016	0	31
YJR042W	YDL213C	0.90112	0	32
YNL216W	YNL206C	0.90107	0	56
YPL146C	YLR320W	0.90104	0	75
YJL125C	YBR081C	0.90038	0	21
YPL022W	YOR279C	0.90011	0	10
YBR245C	YHR196W	0.90008	0	120
YDL058W	YKL213C	0.89992	0	84
YLR386W	YFR037C	0.89991	0	55
YOL040C	YDR182W	0.89988	1	57
YGR166W	YDR245W	0.89936	0	121
YDL148C	YKL049C	0.89928	0	47
YER107C	YKL069W	0.89928	1	94
YPR161C	YOR156C	0.89921	0	67
YHR008C	YNL216W	0.89917	0	37
YLR262C	YOR116C	0.89857	0	87
YPL094C	YPL240C	0.89853	0	176
YJL095W	YER148W	0.89838	0	72
YCR020W-B	YMR112C	0.89814	0	30
YGR188C	YDL138W	0.8981	0	39
YNL127W	YDR359C	0.89809	0	41
YIR011C	YPL093W	0.89801	0	45
YCR034W	YPL211W	0.89792	0	48
YKL021C	YDL168W	0.89786	0	29
YAR003W	YLR024C	0.8978	0	120
YDR191W	YER016W	0.89756	0	31
YNL278W	YKL095W	0.89648	1	26
YDL156W	YCR003W	0.89642	0	32
YOR048C	YMR229C	0.8963	0	52
YIR010W	YLR288C	0.89613	0	40
YOL012C	YNL172W	0.89561	0	103
YBR184W	YPL082C	0.89513	0	14
YJL081C	YDL149W	0.89511	0	47
YLR330W	YPL235W	0.89506	0	77
YBR159W	YML115C	0.89496	0	15
YPL228W	YDL029W	0.89479	0	71
YCR093W	YMR267W	0.89413	0	44
YJR102C	YOR002W	0.894	0	21
YJR042W	YOR232W	0.89362	0	33
YOR181W	YDR432W	0.89338	0	173
YFR037C	YPR112C	0.89331	0	46
YER093C-A	YLR091W	0.8933	0	21
YHR101C	YJR059W	0.89329	0	48
YDL043C	YGL127C	0.89307	0	59
YGR195W	YNL001W	0.893	0	45
YHR082C	YJL101C	0.89283	0	42
YGR264C	YLR007W	0.89271	0	31
YDR276C	YBR274W	0.89245	0	58
YBR171W	YJR144W	0.89241	0	63
YGL115W	YDR153C	0.89192	0	56
YOR043W	YLL050C	0.89152	0	80
YDL074C	YIR023W	0.89149	0	143
YMR112C	YDR468C	0.89113	0	66
YPR112C	YGL045W	0.89096	1	57
YDL160C	YPR152C	0.89081	1	228
YPL022W	YGL155W	0.89081	0	33
YGR180C	YDR045C	0.89047	0	22
YKL021C	YDR247W	0.88986	0	30
YDR156W	YLR056W	0.88974	0	104
YJR117W	YDR276C	0.88968	0	83
YOR205C	YOR125C	0.88963	0	66
YLR024C	YKL160W	0.8896	0	76
YDR325W	YLR222C	0.88919	0	48
YPL037C	YDR062W	0.88919	0	32
YMR282C	YGL219C	0.88914	0	44
YNL099C	YGR113W	0.88889	0	81
YPL211W	YGR091W	0.88821	0	28
YKL214C	YBL003C	0.88771	0	27
YLR193C	YPR179C	0.88761	0	81
YDR320C	YBR126C	0.88759	0	66
YOR261C	YPR066W	0.88747	0	58
YLR060W	YNR038W	0.88745	0	22
YEL019C	YFL033C	0.88725	0	39
YMR223W	YER093C	0.887	0	97
YNL041C	YBR081C	0.88663	0	51
YNL025C	YCR065W	0.88639	0	73
YLR052W	YLR337C	0.88601	0	102
YAL048C	YKL032C	0.88536	0	52
YNL006W	YCR028C-A	0.88479	0	79
YGL253W	YGL011C	0.88477	0	47
YAL048C	YDR087C	0.88446	0	33
YHR134W	YGR092W	0.88403	1	65
YHR134W	YGR092W	0.88403	0	65
YBL031W	YBR034C	0.88397	0	45
YBR107C	YDL126C	0.88358	0	48
YML030W	YFL036W	0.8833	0	39
YIL150C	YHR020W	0.88313	0	27
YDL103C	YER012W	0.88311	0	44
YOR187W	YOR204W	0.88304	0	34
YDL147W	YGL240W	0.88271	0	66
YIL076W	YIL115C	0.88264	0	45
YEL050C	YDR079C-A	0.88251	0	54
YAL025C	YMR298W	0.88237	1	32
YLR291C	YNL098C	0.88222	0	24
YKL145W	YGL014W	0.88201	0	59
YBR009C	YNL197C	0.88125	0	90
YOL108C	YNL054W	0.88103	0	79
YER156C	YLR320W	0.88086	0	43
YDL104C	YCR005C	0.88052	0	11
YDL006W	YJR138W	0.88004	0	65
YOL001W	YNL025C	0.87979	0	94
YCR034W	YOR187W	0.87958	0	30
YNL119W	YMR307W	0.87954	0	109
YNL154C	YER061C	0.87856	0	40
YJL092W	YNL308C	0.87855	0	53
YGR155W	YLL031C	0.87852	0	34
YBR087W	YEL051W	0.87844	0	54
YDL033C	YBR110W	0.87842	0	38
YGR270W	YPL138C	0.87782	0	46
YDL015C	YBR017C	0.87774	1	30
YKL145W	YKR018C	0.8776	0	34
YDR394W	YDR181C	0.87753	0	23
YDL108W	YNR023W	0.87752	0	37
YPL233W	YGL045W	0.87729	0	54
YDR443C	YDR013W	0.87724	1	66
YMR256C	YJR118C	0.87715	0	61
YDL107W	YOR341W	0.87689	0	32
YER165W	YNL178W	0.87657	0	105
YPR162C	YBR029C	0.87613	0	35
YOR008C-A	YMR060C	0.87562	0	14
YDL229W	YOR187W	0.87537	0	41
YPL181W	YPR046W	0.87474	0	41
YAL025C	YFR040W	0.8742	0	37
YGR251W	YGR006W	0.87388	1	61
YMR154C	YLR393W	0.87383	0	53
YKL052C	YCL005W-A	0.8737	0	66
YLR024C	YER116C	0.87369	1	77
YKL004W	YLR393W	0.87368	0	23
YBR170C	YHL023C	0.87352	0	43
YJL117W	YDR162C	0.87345	0	83
YKL204W	YMR039C	0.87344	1	64
YPR110C	YDL028C	0.87341	0	45
YJL125C	YOL144W	0.87336	0	24
YDR054C	YLR340W	0.8733	0	46
YLR015W	YLR190W	0.87269	0	109
YJL034W	YPL181W	0.87266	0	88
YNL308C	YCR016W	0.8722	0	29
YER061C	YNR018W	0.87204	0	30
YOL135C	YGL049C	0.87144	0	28
YMR277W	YNL299W	0.87128	0	52
YPL237W	YLR175W	0.8702	0	35
YDR381W	YGR047C	0.87	0	39
YDR006C	YLR026C	0.86816	0	42
YDR052C	YOR334W	0.86769	0	40
YDR177W	YNL088W	0.86767	0	37
YDL058W	YHR119W	0.8673	0	72
YER031C	YER005W	0.86699	0	25
YDR217C	YLR193C	0.86645	0	65
YOR236W	YOR281C	0.86636	0	12
YPR164W	YCR065W	0.86615	0	52
YGL116W	YLR457C	0.86605	0	36
YGR140W	YLR131C	0.8652	0	47
YNL084C	YOR168W	0.86506	0	35
YOR033C	YKL021C	0.86493	0	19
YLR291C	YNL079C	0.86492	0	56
YBL056W	YDR182W	0.86489	0	36
YDL145C	YBR121C	0.86479	0	55
YHR069C	YPL022W	0.86468	1	36
YHR051W	YJL133C-A	0.86467	0	30
YGR216C	YKL042W	0.86465	0	16
YCR052W	YJL160C	0.86461	0	32
YGL016W	YOL023W	0.86455	0	21
YPL209C	YPL157W	0.86432	0	90
YPL240C	YGL114W	0.86413	0	60
YLR350W	YBL008W	0.86404	0	116
YER118C	YLR045C	0.86393	0	65
YGR277C	YOR080W	0.8638	0	45
YJR070C	YLR061W	0.86342	0	38
YDR172W	YPL068C	0.86313	0	34
YBL074C	YPR105C	0.86236	0	74
YDR404C	YLR008C	0.8615	0	26
YOR350C	YHR041C	0.86144	0	43
YJR032W	YDR398W	0.86101	0	45
YFL008W	YDL208W	0.86088	0	36
YIL153W	YGL100W	0.8606	0	39
YJL115W	YKL028W	0.86056	0	51
YDR394W	YOR160W	0.86049	0	36
YHR177W	YDR060W	0.86002	0	26
YPR085C	YNL251C	0.85988	0	45
YDR302W	YOL013C	0.85986	1	47
YNL091W	YGL001C	0.85971	0	55
YJR084W	YOL049W	0.85915	0	21
YGL195W	YEL012W	0.8586	0	28
YCL032W	YDR067C	0.85854	0	53
YML041C	YIL142W	0.85841	0	98
YCL017C	YJL138C	0.85832	0	45
YMR115W	YAR003W	0.85791	0	40
YDL105W	YNL071W	0.85784	0	62
YMR202W	YDR224C	0.8578	0	36
YMR267W	YML048W	0.85724	0	51
YOR260W	YOR027W	0.85715	1	62
YBL079W	YNL110C	0.85713	0	42
YOR025W	YJL019W	0.85693	0	18
YDL207W	YGR245C	0.85683	0	38
YDR478W	YER112W	0.85678	0	38
YBR128C	YBL050W	0.85657	0	32
YIL017C	YBR036C	0.85625	1	42
YPL266W	YGL238W	0.85617	0	26
YPR086W	YAL019W	0.85605	0	24
YBL031W	YFR027W	0.856	0	25
YCR086W	YPR108W	0.85588	0	95
YKR042W	YLR086W	0.85569	0	30
YDL116W	YDL083C	0.85555	0	36
YLR048W	YDL248W	0.85536	0	27
YDL020C	YJL039C	0.85519	0	83
YJR118C	YBL031W	0.85518	0	62
YCR002C	YDR489W	0.85503	0	28
YOR116C	YER147C	0.855	0	30
YMR294W	YPR183W	0.85453	0	73
YGL071W	YGR119C	0.85373	0	44
YKL073W	YPL101W	0.85345	1	65
YGR058W	YBL050W	0.85311	0	45
YPL002C	YDR369C	0.85304	0	34
YHR021C	YHR081W	0.85288	0	71
YKR082W	YGL255W	0.85247	0	32
YKR065C	YDR123C	0.85223	0	56
YGR065C	YNL080C	0.85208	0	45
YLR306W	YOR174W	0.85192	0	24
YBL017C	YKL021C	0.85157	0	31
YGR178C	YNL169C	0.85155	0	44
YPL232W	YDR137W	0.8508	0	31
YDL132W	YFR027W	0.8507	0	30
YER149C	YPR085C	0.85037	0	44
YBL089W	YGR260W	0.85028	0	20
YLR242C	YHR166C	0.85019	0	93
YMR186W	YKR010C	0.85004	0	50
YEL050C	YML051W	0.84982	0	34
YOL111C	YDL190C	0.84981	0	46
YLR459W	YMR039C	0.84969	0	116
YMR033W	YAR007C	0.84878	0	51
YBL016W	YGR163W	0.8487	0	31
YBL009W	YER016W	0.84867	0	33
YPR112C	YIL017C	0.84843	0	24
YML124C	YIL133C	0.84823	0	27
YMR205C	YPL086C	0.84806	0	52
YJR117W	YGL066W	0.84791	0	83
YDL013W	YBR101C	0.84778	0	29
YGL027C	YLR386W	0.84766	0	37
YPL028W	YHR114W	0.84764	0	25
YPL256C	YMR190C	0.84677	0	67
YER178W	YLR395C	0.84636	0	32
YBL050W	YCR079W	0.84627	0	38
YKL046C	YGL005C	0.84573	0	21
YGL219C	YOL084W	0.84572	0	18
YEL055C	YDL115C	0.84548	0	56
YOR124C	YJL029C	0.84547	0	35
YDR046C	YGL168W	0.8452	0	23
YOL077C	YCL031C	0.84461	0	29
YGR105W	YOR140W	0.84435	0	92
YNL082W	YOR132W	0.84418	0	35
YDR200C	YOR061W	0.84396	0	47
YMR296C	YKL166C	0.84377	0	57
YJL116C	YLR287C	0.8435	0	7
YBR135W	YDL133W	0.8434	0	26
YDL156W	YBR107C	0.84305	0	37
YJR042W	YBL035C	0.84246	0	51
YLR056W	YBL078C	0.8424	0	77
YKL160W	YPL151C	0.84196	0	30
YHR002W	YBL030C	0.84193	0	22
YGR245C	YNL038W	0.8411	0	31
YGR252W	YDL105W	0.84082	0	137
YGL233W	YIL115C	0.84076	0	34
YDL188C	YER083C	0.84063	0	47
YKL002W	YLR061W	0.84055	0	35
YHR021C	YKL127W	0.84032	0	35
YDL209C	YBR193C	0.84009	0	22
YMR047C	YIL106W	0.84004	0	63
YDR276C	YNL052W	0.83994	0	50
YJL138C	YNL197C	0.8399	0	48
YKL104C	YNL032W	0.83932	1	38
YPL254W	YLR350W	0.83926	1	65
YOR123C	YOR344C	0.83873	1	52
YLL004W	YBR118W	0.83848	0	28
YPR045C	YKL053C-A	0.83816	0	47
YNL219C	YPR181C	0.83807	0	30
YPR094W	YJL072C	0.838	0	19
YGR174C	YDR164C	0.8371	0	47
YNL097C	YDL173W	0.83647	0	30
YPL148C	YOR020C	0.83616	0	40
YML103C	YGR251W	0.83543	0	84
YHR013C	YFL009W	0.83527	0	64
YPR057W	YPL084W	0.83496	0	54
YOL023W	YLR027C	0.83483	0	18
YDL101C	YDR382W	0.8343	0	42
YEL032W	YKR092C	0.83418	0	39
YNL273W	YDR162C	0.83387	0	86
YOL067C	YNL221C	0.83365	0	54
YOL006C	YGR250C	0.83335	0	28
YDR484W	YMR299C	0.83323	0	52
YCR071C	YOR116C	0.83315	0	32
YOL002C	YJL014W	0.83294	0	16
YKR083C	YDL035C	0.83273	0	36
YKL027W	YOR068C	0.83236	0	25
YCL029C	YOR048C	0.83231	0	35
YJL062W	YGL081W	0.8318	0	32
YPR133C	YHL025W	0.83167	1	82
YMR035W	YHR077C	0.83144	0	38
YML028W	YOL034W	0.83114	1	61
YML028W	YOL034W	0.83114	0	61
YBR234C	YLL011W	0.83101	0	21
YFR024C-A	YDR288W	0.83078	0	22
YDR075W	YGR195W	0.83038	0	28
YER093C	YMR016C	0.83036	0	40
YNL172W	YIL115C	0.83031	0	41
YKL157W	YOL044W	0.83021	0	22
YPL231W	YKL204W	0.8299	0	49
YBR089C-A	YLR103C	0.82968	0	30
YDL130W	YKL144C	0.8296	0	37
YGR135W	YFL031W	0.82949	0	93
YDR288W	YLR154C-H	0.82932	0	36
YER110C	YPL007C	0.82931	0	18
YDR172W	YGR047C	0.82916	0	48
YCL061C	YOR360C	0.82906	0	102
YFL024C	YOR046C	0.82893	0	43
YIL153W	YMR275C	0.82886	0	30
YKR016W	YPL028W	0.82885	0	30
YMR312W	YFR031C-A	0.82861	0	74
YHL031C	YMR227C	0.8283	0	36
YIL150C	YPR110C	0.82823	0	27
YJR125C	YEL018W	0.8279	0	32
YOR293W	YOL038W	0.82763	0	37
YBR010W	YAL011W	0.82712	0	206
YHR051W	YJR070C	0.82705	0	24
YDR233C	YMR293C	0.8269	0	20
YJL102W	YBR009C	0.82687	0	43
YNL199C	YIL131C	0.82653	0	28
YGL084C	YER120W	0.82648	0	83
YHR040W	YOR295W	0.82615	0	33
YBR167C	YKR046C	0.82558	0	27
YIR006C	YMR304W	0.82549	0	45
YLR009W	YDL065C	0.82495	0	38
YHR083W	YFR004W	0.82492	0	47
YJL154C	YJL039C	0.82491	0	54
YJR099W	YML024W	0.8249	0	13
YPR046W	YOR068C	0.82485	0	23
YDL209C	YNL245C	0.82473	1	39
YJL165C	YDR075W	0.82456	0	36
YHL025W	YLR370C	0.82404	0	73
YFL003C	YGR231C	0.82402	0	41
YNL269W	YGL027C	0.82351	0	13
YDR181C	YER111C	0.82336	0	67
YLR075W	YOL127W	0.82335	0	56
YML069W	YDR079C-A	0.82274	0	60
YMR290C	YCL005W-A	0.82273	0	39
YBL031W	YLR015W	0.82229	0	54
YDL074C	YKL121W	0.82204	0	39
YOL090W	YLR383W	0.822	0	36
YNL199C	YDL001W	0.8218	0	39
YDL042C	YNL252C	0.82171	0	55
YJR064W	YHR079C	0.82141	0	37
YBR111C	YML008C	0.82137	0	42
YOR117W	YJR097W	0.82133	0	37
YDR155C	YDR138W	0.82123	0	11
YNL107W	YPL139C	0.82115	0	101
YDR197W	YNL061W	0.82078	0	32
YNR016C	YGL073W	0.82073	1	49
YMR022W	YDR478W	0.8205	0	30
YPR094W	YNL288W	0.82021	0	27
YHR186C	YFL001W	0.82015	0	63
YGR140W	YMR025W	0.81997	0	22
YBR254C	YLR404W	0.81966	0	61
YGR009C	YLL049W	0.81935	0	49
YKL154W	YLR027C	0.8185	0	20
YDL102W	YKL081W	0.81811	0	86
YOR205C	YAL019W	0.81794	0	31
YOR089C	YDL148C	0.8179	0	50
YOR206W	YLR075W	0.81781	1	44
YDR395W	YOL145C	0.81749	0	24
YBR194W	YLR457C	0.81712	0	20
YJL165C	YGR229C	0.81707	1	49
YDL134C	YAL020C	0.81693	0	21
YDR512C	YJR121W	0.81691	0	35
YIL026C	YGL123W	0.81652	0	28
YBR126C	YMR275C	0.81626	0	40
YOR168W	YGL148W	0.81612	0	33
YLR272C	YGR253C	0.81591	0	29
YMR077C	YCR086W	0.81587	0	37
YLR096W	YOL076W	0.81564	0	13
YER111C	YMR154C	0.81554	0	119
YOR246C	YOL052C	0.81443	0	20
YOR020C	YAL025C	0.8138	0	59
YGR174C	YLR056W	0.81287	1	85
YLR350W	YKR027W	0.81283	0	47
YPR082C	YGL065C	0.8125	0	15
YOR233W	YHR066W	0.81236	0	29
YMR021C	YML023C	0.81229	0	50
YNR018W	YPL008W	0.81193	0	24
YCL044C	YDR382W	0.81188	0	40
YER091C	YGL115W	0.81154	1	42
YLR397C	YDR283C	0.81151	0	24
YPR181C	YHR099W	0.81148	0	51
YML067C	YNL037C	0.81146	0	17
YBR227C	YNL209W	0.81146	0	46
YLR298C	YDR324C	0.8111	0	50
YBL084C	YNL135C	0.81065	0	45
YHR079C	YLR292C	0.80998	0	85
YHR079C	YLR292C	0.80998	1	85
YBR055C	YBR215W	0.80975	0	36
YPL093W	YML066C	0.80954	0	18
YOL005C	YHR196W	0.80937	0	49
YHR101C	YHR001W	0.80916	0	20
YDL248W	YJR035W	0.80904	0	9
YDL248W	YFL022C	0.80903	0	23
YGR006W	YLL014W	0.809	0	37
YOL149W	YGR009C	0.80892	0	52
YHR058C	YIL079C	0.80882	0	26
YOR080W	YGL036W	0.80881	0	35
YLR095C	YDR369C	0.80841	0	24
YPR061C	YDR381W	0.80839	0	22
YBL061C	YLL040C	0.80835	0	43
YGR200C	YPL262W	0.80751	0	81
YDR341C	YNL147W	0.80689	1	33
YNL270C	YNL041C	0.8064	0	13
YAL033W	YLR078C	0.8061	0	46
YJR126C	YBR275C	0.80592	0	6
YBL016W	YIL006W	0.80588	0	25
YPL016W	YER147C	0.80577	0	36
YJL204C	YJL104W	0.8056	0	26
YDR523C	YGR140W	0.80546	0	10
YGL141W	YNL153C	0.80529	0	31
YJR013W	YPR024W	0.8051	0	37
YBR057C	YPL076W	0.80506	0	61
YJR011C	YJR112W	0.80473	0	22
YKR038C	YHR167W	0.80458	0	16
YNL032W	YMR237W	0.80457	0	28
YGR215W	YBL105C	0.80437	0	30
YDR060W	YNR049C	0.80437	0	27
YOR293W	YGL133W	0.80417	0	29
YOR201C	YIL022W	0.80372	0	9
YOL095C	YCR086W	0.80367	0	31
YJR140C	YOL090W	0.80353	0	62
YGL190C	YMR079W	0.80349	0	47
YNL006W	YOR321W	0.80344	0	28
YMR201C	YOR242C	0.80332	0	21
YPL051W	YGR206W	0.80332	0	59
YML072C	YER127W	0.80317	0	19
YPL120W	YMR275C	0.80311	0	51
YOL113W	YDR017C	0.80263	0	18
YMR301C	YDL107W	0.80259	0	11
YLL035W	YER061C	0.80236	0	37
YGL211W	YDL082W	0.80214	0	51
YOL066C	YNL242W	0.80211	0	13
YNR007C	YBR029C	0.80191	0	22
YNL280C	YER171W	0.80173	0	37
YPL180W	YJR143C	0.80173	0	9
YIL107C	YLR115W	0.80122	0	37
YGL025C	YMR277W	0.80118	0	53
YGL043W	YLR021W	0.80102	0	68
YOL077C	YKR035W-A	0.80097	0	22
YLR288C	YOR068C	0.8007	0	25
YNL216W	YDR236C	0.80045	0	44
YNL232W	YCR054C	0.79976	0	25
YBR221C	YAR002W	0.79945	0	38
YGR063C	YDL220C	0.79903	0	77
YIR010W	YDR236C	0.79892	0	41
YOR014W	YER118C	0.79858	1	52
YPL122C	YOL149W	0.79831	0	41
YJL165C	YJR065C	0.79824	0	43
YPR085C	YLR153C	0.79806	0	56
YOL084W	YDL090C	0.79778	0	6
YDR182W	YDR204W	0.79765	0	43
YFR008W	YJR059W	0.79723	1	47
YHR156C	YFL029C	0.79708	0	12
YFR003C	YHR166C	0.79632	0	45
YBL056W	YMR060C	0.79606	0	16
YEL032W	YLR226W	0.79595	0	17
YOL126C	YMR215W	0.79564	0	25
YBR101C	YPL022W	0.79555	0	15
YLL015W	YDR052C	0.79541	0	26
YOR132W	YKL053C-A	0.79492	0	52
YGR057C	YLR243W	0.79449	0	27
YCR003W	YCL001W-B	0.79439	0	9
YOR360C	YPR074C	0.79438	0	39
YIL134C-A	YGL241W	0.79425	0	14
YNL271C	YLR227C	0.79409	0	22
YBR010W	YBR065C	0.79398	0	35
YOR223W	YJL183W	0.79342	0	15
YGL153W	YDR389W	0.79334	0	25
YOL002C	YHR012W	0.79332	0	32
YDL047W	YGL107C	0.79301	0	11
YDR227W	YGL255W	0.79271	0	10
YKR084C	YPR042C	0.79266	0	42
YDR393W	YLR060W	0.7926	0	20
YJL203W	YPR074C	0.79259	0	26
YJL030W	YGR240C	0.79212	0	36
YPL109C	YPR036W	0.79209	0	13
YBL015W	YJR101W	0.79209	0	6
YGR009C	YER162C	0.79208	0	33
YGL136C	YDR012W	0.79183	0	33
YHR062C	YOR181W	0.79179	0	61
YDL122W	YBR055C	0.79166	0	25
YGR016W	YLR310C	0.79164	0	15
YLR005W	YML030W	0.79146	0	52
YNL047C	YLR267W	0.79142	0	14
YNL121C	YMR256C	0.79131	1	26
YLR083C	YMR010W	0.79096	1	10
YIL097W	YJL183W	0.79065	0	62
YKR081C	YIL016W	0.79053	0	54
YNL064C	YGR209C	0.78969	0	52
YPL084W	YIR008C	0.78956	1	33
YGR229C	YMR135C	0.78914	0	33
YOR191W	YKL032C	0.78878	0	51
YDL058W	YNR017W	0.78841	0	30
YMR052W	YER086W	0.78836	0	15
YLR452C	YGL235W	0.78822	0	37
YOR213C	YCL061C	0.78806	0	37
YFR053C	YFL016C	0.788	0	4
YIL027C	YDR479C	0.78783	0	19
YPL241C	YBL088C	0.78734	0	15
YPL085W	YGL190C	0.78726	0	55
YNL243W	YDL080C	0.78724	0	29
YDL130W	YPL060W	0.78722	0	12
YMR264W	YCL010C	0.78721	0	38
YMR033W	YFR019W	0.78716	0	53
YMR094W	YPL204W	0.78716	0	43
YGR038W	YGR135W	0.78696	0	27
YPR105C	YER142C	0.78691	0	26
YHR040W	YML046W	0.78665	0	14
YFR009W	YDL138W	0.7866	0	23
YBL052C	YPL128C	0.78637	0	26
YCR046C	YCR071C	0.78613	1	45
YGR090W	YLR009W	0.78536	0	30
YGR033C	YDL008W	0.78501	0	21
YBR057C	YGL123W	0.78466	0	47
YNL149C	YPR048W	0.78423	0	16
YJL128C	YPL231W	0.78418	0	73
YNL154C	YDR392W	0.78337	0	60
YDR359C	YOR232W	0.78323	0	52
YAL033W	YDR527W	0.78263	0	22
YDL084W	YPR042C	0.78259	0	65
YHR177W	YDL215C	0.78234	0	12
YGR188C	YOL052C	0.78155	0	80
YIL147C	YLR190W	0.78152	0	39
YGR229C	YBR101C	0.78121	0	25
YPL124W	YDR128W	0.78106	0	18
YMR273C	YCR052W	0.78084	0	33
YLR243W	YPL231W	0.78076	0	34
YOR073W	YLR119W	0.78072	0	43
YNL094W	YPR024W	0.78014	0	38
YFR024C-A	YKL002W	0.77989	0	13
YLR421C	YJL104W	0.77937	0	26
YGL071W	YLR026C	0.77925	0	47
YGR056W	YLR150W	0.77921	0	38
YDR044W	YDR320C	0.77895	0	40
YDR320C	YKL109W	0.77873	0	38
YDR524C-B	YDR307W	0.77839	0	19
YOR368W	YLR314C	0.77795	0	44
YNL071W	YDR400W	0.77791	0	11
YDR440W	YPL036W	0.77773	0	21
YBL085W	YGL061C	0.77741	0	25
YBR009C	YDR148C	0.7771	0	59
YOR061W	YNR053C	0.77699	0	41
YIR009W	YBR088C	0.77698	0	25
YNL052W	YPL144W	0.77667	0	29
YBL021C	YIR006C	0.77654	0	76
YGR185C	YLL045C	0.77638	0	27
YNL110C	YJR107W	0.77633	0	6
YKL009W	YBR110W	0.77622	0	53
YDL043C	YIL038C	0.77615	0	30
YPL039W	YKR020W	0.77603	1	43
YNR024W	YOR206W	0.77601	0	8
YJL013C	YHR027C	0.77599	0	31
YOR278W	YDL248W	0.77593	0	13
YLR078C	YBR179C	0.77575	0	22
YGR078C	YJL210W	0.7756	0	25
YNL248C	YOR198C	0.7753	0	129
YNL248C	YOR198C	0.7753	1	129
YBR126C	YDR233C	0.77521	0	27
YHR205W	YAL043C	0.77518	0	45
YML014W	YOL006C	0.77502	0	27
YNL290W	YDL182W	0.77465	0	14
YJL190C	YHR167W	0.77465	0	25
YHR193C	YOR244W	0.77441	0	87
YBL089W	YML103C	0.77379	0	36
YDR404C	YDR361C	0.77372	0	27
YHR107C	YML112W	0.77339	0	58
YJL085W	YNL242W	0.77326	0	40
YOR196C	YER048C	0.77321	0	52
YNL219C	YNL141W	0.77317	0	32
YOR017W	YDL028C	0.77292	0	43
YOR010C	YDL100C	0.77278	0	14
YPL115C	YDR173C	0.77253	0	5
YDR497C	YOL081W	0.77213	0	37
YOR141C	YMR165C	0.77181	0	73
YDR311W	YOR340C	0.77143	0	40
YKR026C	YLR200W	0.77119	0	46
YJR143C	YDL103C	0.77065	0	26
YNL169C	YGL059W	0.7705	0	13
YJL124C	YBR033W	0.77045	0	41
YDR147W	YBR147W	0.77042	0	4
YJL115W	YIL118W	0.77001	0	61
YDR469W	YDR073W	0.77001	0	37
YDR432W	YJR007W	0.76991	0	91
YDR050C	YEL050C	0.76943	0	24
YJL074C	YHR082C	0.76936	0	61
YER168C	YGR048W	0.76932	0	21
YDL028C	YGR184C	0.76926	0	55
YAL043C	YLR103C	0.76897	0	26
YLR138W	YHR023W	0.76871	0	6
YCR090C	YHR196W	0.76848	0	38
YCL032W	YKR092C	0.76806	0	51
YDL111C	YBR170C	0.76795	0	11
YJL125C	YBR164C	0.76773	0	41
YGL163C	YCR082W	0.76753	0	11
YKL021C	YLR166C	0.76723	0	37
YNL164C	YOL064C	0.76723	0	28
YPR160W	YGL215W	0.76717	0	29
YKR062W	YBL071W-A	0.76714	0	21
YML041C	YBR130C	0.76673	0	42
YPL031C	YAL012W	0.76665	0	36
YPR122W	YJR118C	0.76642	0	32
YDR381W	YDR308C	0.76636	0	39
YNL185C	YJL034W	0.76632	0	32
YJR141W	YLL008W	0.76613	0	22
YLR323C	YPL081W	0.76593	0	18
YDL135C	YPL174C	0.76593	0	23
YCR048W	YEL034W	0.76515	0	43
YMR022W	YER177W	0.76508	0	46
YHR208W	YJL200C	0.76489	0	11
YKL053C-A	YMR146C	0.76425	0	50
YML024W	YJL005W	0.76385	0	15
YOL025W	YBR231C	0.7638	0	15
YKL106W	YDR377W	0.7638	0	8
YML053C	YOL009C	0.7632	1	24
YBR139W	YHR098C	0.76299	0	14
YLR370C	YNR016C	0.76287	0	29
YNR053C	YJL002C	0.76285	0	33
YGR238C	YPR046W	0.76267	0	15
YBR035C	YCL025C	0.76239	0	19
YLR079W	YCL043C	0.76188	0	46
YPL146C	YJL008C	0.76127	0	39
YBR160W	YBL075C	0.76119	0	44
YLR238W	YEL018W	0.76089	0	34
YGR185C	YOR046C	0.76088	0	38
YMR224C	YER025W	0.76047	0	95
YJL013C	YJR035W	0.76015	0	11
YOR312C	YPL028W	0.76011	0	23
YLR116W	YDR382W	0.75984	0	29
YOL123W	YPR151C	0.75972	0	13
YDR069C	YKL215C	0.75948	0	9
YNL110C	YDR080W	0.75899	0	36
YKL104C	YNL152W	0.75886	0	25
YNL252C	YNL052W	0.75866	0	26
YLR332W	YPR069C	0.75848	0	16
YDR531W	YDR339C	0.75844	0	32
YFL036W	YML123C	0.75831	0	18
YGR275W	YAL024C	0.75815	0	32
YMR003W	YCR079W	0.75811	0	26
YMR208W	YPL010W	0.75727	0	14
YER162C	YNR061C	0.75712	0	5
YNL229C	YPR088C	0.75705	0	20
YAR002C-A	YBR200W	0.75689	0	38
YHL025W	YBR211C	0.75684	0	53
YDR405W	YOL077C	0.75655	0	14
YMR154C	YPL060W	0.75638	0	21
YMR215W	YOR030W	0.75602	0	19
YDR236C	YKL007W	0.75598	0	15
YDR399W	YOR048C	0.75571	0	47
YKL073W	YBR258C	0.75529	0	16
YNL308C	YIL144W	0.7547	0	30
YOR058C	YML121W	0.75467	0	54
YDL115C	YKL080W	0.75464	0	32
YOR125C	YMR030W-A	0.75462	0	17
YGL194C	YDR328C	0.75453	0	16
YNL086W	YBR282W	0.75443	0	9
YFL013C	YNL241C	0.75442	0	45
YJR017C	YCR003W	0.75435	0	48
YDL061C	YKR094C	0.75425	0	40
YML041C	YLR281C	0.75425	0	53
YNL025C	YOR036W	0.75423	0	14
YLR072W	YIL046W	0.75395	0	14
YJL081C	YDR079C-A	0.75385	0	55
YLR295C	YDL015C	0.75384	0	21
YOR362C	YJL049W	0.75322	0	39
YPR141C	YIL061C	0.75322	0	15
YDR016C	YJR132W	0.75291	0	9
YGR196C	YMR292W	0.75273	0	25
YFR052W	YDR097C	0.75272	0	26
YPR061C	YBL091C-A	0.75265	0	5
YOR125C	YLR370C	0.75249	0	47
YKL089W	YCR016W	0.75237	0	23
YMR003W	YOR149C	0.75228	0	30
YOR125C	YOR168W	0.75173	0	22
YPR074C	YOR246C	0.7517	0	20
YDR105C	YNL055C	0.75167	0	24
YJR041C	YPR135W	0.75158	0	36
YDR337W	YDL081C	0.75156	0	7
YMR294W	YGR033C	0.75142	0	28
YPL042C	YPL157W	0.75139	0	84
YDR213W	YOR039W	0.75137	0	19
YER153C	YOL001W	0.75128	0	43
YKR001C	YLR274W	0.75102	0	46
YBR194W	YGR285C	0.75083	0	24
YBR127C	YGL135W	0.7506	0	33
YJL149W	YDR189W	0.75055	0	12
YLR325C	YLR418C	0.7505	0	75
YJL030W	YAL017W	0.75047	0	16
YPR104C	YEL051W	0.7504	0	55
YOR236W	YLR292C	0.75039	0	40
YLR404W	YGL235W	0.75035	0	25
YDL192W	YER156C	0.75028	0	24
YDL053C	YHR041C	0.75028	1	31
YDR245W	YPL103C	0.75026	0	32
YPL217C	YOR171C	0.75018	0	24
YJL014W	YJL130C	0.7501	0	28
YLR026C	YER021W	0.75004	0	24
YOR167C	YNL061W	0.74978	0	37
YPR185W	YLR347C	0.74969	0	34
YGR283C	YDR246W	0.74962	0	24
YJL138C	YEL015W	0.74951	0	17
YMR284W	YPR089W	0.74921	1	22
YBL061C	YBR236C	0.74904	0	38
YNL106C	YCL043C	0.74898	0	37
YDL212W	YDL161W	0.74895	0	21
YOR244W	YOR086C	0.74892	0	33
YIR022W	YLR186W	0.74887	0	40
YHR041C	YOL102C	0.74877	0	50
YKL143W	YNL175C	0.74874	0	17
YDL248W	YFL025C	0.7483	0	47
YKL173W	YOR045W	0.74827	0	28
YGL253W	YOL023W	0.74818	0	27
YNL272C	YPR066W	0.74779	0	40
YLR227C	YML115C	0.74771	0	13
YHL020C	YLL035W	0.74768	0	33
YDR231C	YIL110W	0.74764	0	11
YGL014W	YDR359C	0.74757	0	50
YLR090W	YDR027C	0.74719	0	11
YNL098C	YLL001W	0.74662	0	42
YNL147W	YDR337W	0.74645	0	22
YAL011W	YDR308C	0.74622	0	52
YJL008C	YGL115W	0.74602	0	101
YOR217W	YDR235W	0.74597	0	13
YIL109C	YBR161W	0.74586	0	15
YGR089W	YPL084W	0.74577	0	36
YJL163C	YHR007C	0.74555	0	14
YMR037C	YOL081W	0.74518	0	79
YNL100W	YIL040W	0.74477	0	24
YLR455W	YEL026W	0.74462	0	17
YOR295W	YJR136C	0.74462	0	23
YGL086W	YNL068C	0.7443	0	46
YLR373C	YIL079C	0.74426	0	18
YJR097W	YIL137C	0.74424	0	20
YGL080W	YLR320W	0.74419	0	35
YOL091W	YKL045W	0.74411	0	8
YNL070W	YOR009W	0.74372	0	10
YJL177W	YJR011C	0.74371	0	24
YOL119C	YLR393W	0.74334	0	18
YDL248W	YHR011W	0.74324	0	15
YJL092W	YNL185C	0.74294	0	22
YMR190C	YLR172C	0.7429	0	45
YIR025W	YOR269W	0.7428	0	16
YDR137W	YPL060W	0.74263	0	21
YPR089W	YER061C	0.74258	0	33
YMR202W	YOR165W	0.74253	0	26
YNR052C	YEL027W	0.74247	0	35
YDR449C	YDL029W	0.74238	0	28
YNR052C	YML072C	0.7423	0	31
YDR478W	YNL250W	0.74228	0	46
YJR090C	YJL183W	0.74214	0	19
YDR432W	YMR044W	0.74196	1	59
YDR016C	YGR197C	0.74195	0	27
YNL189W	YOR370C	0.74186	0	58
YGR202C	YGR229C	0.74136	0	31
YLL014W	YJR120W	0.74116	0	24
YDR060W	YER146W	0.74096	0	12
YBL020W	YML111W	0.74065	0	28
YDR400W	YPR161C	0.74059	0	24
YER042W	YEL051W	0.74032	0	18
YMR117C	YDR197W	0.74004	0	26
YDR145W	YPL140C	0.73966	0	37
YIR029W	YGL098W	0.73962	0	14
YLR278C	YIL084C	0.73949	0	52
YLR218C	YDR316W	0.73934	0	40
YLR342W	YJR055W	0.73901	1	16
YHR118C	YOL071W	0.73894	1	15
YIL150C	YOR067C	0.73778	0	33
YCR079W	YOR069W	0.73765	0	39
YDR320C	YLR066W	0.73764	0	27
YIL048W	YLR135W	0.73743	0	36
YML106W	YDR164C	0.73713	0	19
YKR081C	YLR272C	0.73711	0	27
YFR040W	YMR109W	0.73706	0	42
YLR275W	YCR037C	0.73664	0	17
YLR024C	YGR086C	0.73653	0	32
YBR107C	YER107C	0.7362	0	39
YJL117W	YGR284C	0.73614	0	57
YMR179W	YOR020C	0.73544	0	77
YDR484W	YIL146C	0.7353	0	37
YDR375C	YER009W	0.73514	0	19
YBR218C	YKL117W	0.73501	0	23
YPR088C	YIL038C	0.73406	0	18
YLL024C	YLR264W	0.73405	0	30
YMR095C	YOR072W-B	0.7337	0	5
YJL138C	YIL147C	0.73351	0	22
YLL026W	YNL241C	0.73315	0	45
YML063W	YDL017W	0.73278	0	37
YLR371W	YML052W	0.73237	1	47
YHL015W-A	YML003W	0.73234	0	6
YLR288C	YMR033W	0.7322	0	28
YOL008W	YPL094C	0.73219	0	40
YPL066W	YPL152W	0.73214	0	13
YLR383W	YOL097C	0.73153	0	23
YKL144C	YOR075W	0.73146	0	24
YGR181W	YDL207W	0.73143	0	30
YAR003W	YHR006W	0.73118	0	31
YPL167C	YDL035C	0.73115	0	17
YBR142W	YCL050C	0.73105	0	13
YMR154C	YDR518W	0.73009	0	20
YMR293C	YKR058W	0.72988	0	10
YER161C	YNL056W	0.72987	0	48
YML123C	YAL015C	0.72966	0	6
YFL009W	YPR022C	0.72949	0	26
YPR031W	YDL007W	0.72941	0	25
YGL124C	YPL011C	0.7294	0	46
YBR110W	YLL045C	0.7293	0	28
YDR145W	YOR128C	0.72924	0	25
YDR123C	YOL123W	0.72916	0	52
YDR479C	YJL062W-A	0.7288	0	11
YOR312C	YKL060C	0.72865	0	23
YLR005W	YGR048W	0.72839	0	36
YJL102W	YDR043C	0.72809	0	27
YBR068C	YDL142C	0.7275	0	19
YDR144C	YER167W	0.72731	0	15
YGL135W	YDL035C	0.72727	0	23
YDR231C	YGL211W	0.72667	0	30
YCL069W	YDL168W	0.72645	0	1
YFR021W	YLR242C	0.72625	0	42
YPL001W	YNL002C	0.72617	0	26
YLR429W	YAL048C	0.72602	0	15
YMR026C	YOL149W	0.72588	0	43
YKR081C	YPR154W	0.72579	0	11
YDR492W	YLR418C	0.72573	0	23
YNL082W	YBR247C	0.72551	0	16
YDR059C	YOR261C	0.7252	0	19
YPR048W	YPR083W	0.72516	0	9
YBL105C	YIR016W	0.7251	0	55
YFR024C-A	YDL047W	0.72507	0	15
YKL046C	YKL073W	0.72501	0	12
YFL005W	YDR181C	0.72491	0	20
YIL144W	YGR277C	0.7249	0	28
YDL168W	YOR103C	0.72478	0	20
YPR082C	YMR272C	0.72432	0	37
YKL022C	YMR230W	0.72428	0	17
YJL020C	YJR006W	0.72418	0	23
YDR434W	YHR120W	0.72416	0	17
YDL122W	YLL011W	0.72376	0	21
YMR227C	YNR007C	0.72319	0	25
YKR086W	YKL087C	0.72295	1	18
YER031C	YER129W	0.72283	0	25
YPL226W	YDR517W	0.72198	0	14
YNL221C	YBR121C	0.72163	0	38
YER003C	YMR038C	0.72111	0	31
YJL003W	YKR018C	0.72106	0	11
YKR031C	YOR057W	0.72104	0	18
YML107C	YOL051W	0.72089	0	23
YKR007W	YLR395C	0.72084	0	19
YBL013W	YNR011C	0.72064	1	18
YDR361C	YHR172W	0.72017	0	17
YDR294C	YGR036C	0.71991	0	10
YPR084W	YIL038C	0.71952	0	13
YOL094C	YNR004W	0.7191	0	22
YGR289C	YPR036W	0.71892	0	24
YER086W	YHR197W	0.71875	0	10
YNR006W	YLR288C	0.71857	0	40
YPL120W	YOL020W	0.71837	0	21
YNL016W	YML032C	0.71812	0	64
YHR048W	YER178W	0.71805	0	11
YPL006W	YHR027C	0.71797	0	40
YGL242C	YLL023C	0.71793	0	20
YJR136C	YJL194W	0.71784	0	38
YDR162C	YOR056C	0.71776	0	60
YKR035W-A	YLR346C	0.7176	0	14
YKL089W	YDL149W	0.71755	0	25
YPL246C	YNL154C	0.71753	0	15
YPR117W	YDR386W	0.71752	0	6
YDR153C	YPL084W	0.71735	0	22
YPL254W	YDL083C	0.71733	0	17
YJL004C	YKL010C	0.71723	0	23
YBL093C	YDR369C	0.71719	0	16
YMR284W	YGL238W	0.71672	0	42
YML024W	YOR056C	0.71664	0	17
YBR031W	YLR397C	0.71658	0	30
YIL003W	YHR200W	0.71655	0	57
YLR242C	YGR063C	0.71625	0	55
YNL262W	YLR361C	0.71615	1	36
YIL008W	YBR088C	0.71615	0	44
YDR148C	YOR031W	0.71611	0	14
YDR113C	YLR074C	0.71596	0	31
YER153C	YNL172W	0.71564	0	33
YGL198W	YKL059C	0.71554	0	8
YBR245C	YDL072C	0.71533	0	19
YDL223C	YKL110C	0.7152	0	20
YHR083W	YDR469W	0.7152	0	19
YJL034W	YNR011C	0.71462	0	67
YML001W	YMR298W	0.71456	0	39
YER025W	YOR020C	0.7144	0	83
YLR072W	YPL183W-A	0.71414	0	8
YGL187C	YOR010C	0.71413	0	4
YHR188C	YER086W	0.71407	0	27
YOR174W	YMR215W	0.71389	0	30
YLR083C	YBR070C	0.71376	0	14
YCL025C	YJL127C	0.71364	0	28
YMR080C	YER035W	0.71337	0	14
YML121W	YLR212C	0.71273	0	30
YGL054C	YOR143C	0.71247	0	37
YBR026C	YMR167W	0.71229	0	28
YHR118C	YEL009C	0.71224	0	45
YDL142C	YBR040W	0.71211	0	13
YHR206W	YGR218W	0.71178	0	74
YGR125W	YML114C	0.71161	0	19
YIL098C	YFL041W	0.71158	0	6
YBL047C	YNL163C	0.7114	0	30
YOR259C	YEL030W	0.71136	0	20
YDR145W	YBR133C	0.71116	0	49
YJL057C	YNL061W	0.711	0	34
YJL011C	YLR147C	0.71085	0	17
YGL049C	YDR127W	0.71078	0	24
YGL107C	YER024W	0.71069	0	12
YKL009W	YDR146C	0.71061	0	59
YLR052W	YDR191W	0.71061	0	21
YOR321W	YDL107W	0.71059	0	6
YPL152W	YLR415C	0.71037	0	8
YKL004W	YNR055C	0.70999	0	8
YGL105W	YLR221C	0.70977	0	29
YPR171W	YCR071C	0.7092	1	8
YJL111W	YBR200W	0.70878	0	39
YMR293C	YDR397C	0.70865	0	36
YOR221C	YFL045C	0.70857	0	26
YBL021C	YDR213W	0.70828	0	20
YHR025W	YDR378C	0.70798	0	36
YDR073W	YPR173C	0.70782	0	43
YOR394C-A	YPL007C	0.70781	0	8
YGR112W	YKR043C	0.7077	0	5
YGR274C	YLR018C	0.70757	0	48
YDR260C	YLR330W	0.70718	0	39
YKL027W	YIL016W	0.70679	0	18
YKR091W	YOR033C	0.70678	0	8
YDR456W	YDR016C	0.70636	0	30
YBR173C	YIL091C	0.70618	0	16
YBL088C	YML015C	0.70605	0	18
YDR049W	YPL093W	0.7058	0	57
YOR326W	YPL046C	0.70553	0	33
YEL036C	YDR524C	0.70452	1	17
YMR135C	YKL176C	0.70408	0	23
YLR170C	YGL120C	0.70398	0	28
YDR420W	YNL149C	0.70392	0	19
YDL208W	YIL069C	0.70379	0	26
YJL062W-A	YDR485C	0.70352	0	45
YER029C	YMR080C	0.70352	0	36
YLR404W	YJR046W	0.70342	0	16
YNL061W	YLR264C-A	0.70278	0	21
YOL124C	YDR508C	0.70268	0	11
YIL049W	YDR160W	0.70231	0	5
YAL048C	YKR003W	0.70231	0	6
YBR283C	YDR432W	0.70205	0	53
YMR186W	YKR003W	0.70165	0	33
YPL066W	YGL237C	0.70161	0	17
YGR163W	YKL171W	0.70147	0	14
YBR210W	YPR105C	0.70146	0	25
YPR167C	YGL150C	0.70137	0	19
YKR022C	YGR038W	0.70133	0	14
YBR257W	YER060W-A	0.70106	0	7
YGR264C	YLR292C	0.70085	0	46
YHR206W	YEL051W	0.70008	0	50
YPL169C	YOR210W	0.69996	0	59
YLL013C	YJR095W	0.69993	0	35
YJL002C	YGR185C	0.69931	0	32
YLR360W	YKL020C	0.69925	0	30
YIL004C	YCR095C	0.6991	0	26
YGL012W	YDR059C	0.69905	0	2
YER093C-A	YAL064W	0.69895	0	6
YKL203C	YDL188C	0.69862	0	28
YBL072C	YNL241C	0.6985	0	36
YBL041W	YBL091C-A	0.69837	0	12
YDR356W	YDL149W	0.6982	0	21
YNL053W	YKL069W	0.69819	0	30
YER029C	YIL112W	0.69816	0	10
YDR163W	YAR018C	0.69795	0	22
YBR111W-A	YPR079W	0.69792	0	30
YLR089C	YNL260C	0.69786	0	28
YGL031C	YDR292C	0.69764	0	29
YIL049W	YJL057C	0.69745	0	3
YNL080C	YJR010C-A	0.69733	1	34
YDL014W	YGL250W	0.69724	0	18
YBL008W	YGL222C	0.69723	0	28
YKL101W	YPL039W	0.69712	0	29
YDR518W	YFL037W	0.6967	0	25
YDR402C	YCR003W	0.69663	0	11
YBR200W	YHR006W	0.69657	0	22
YJL020C	YCR095C	0.69642	0	27
YJR148W	YML097C	0.69632	0	33
YJR088C	YMR281W	0.69615	0	22
YML006C	YDR466W	0.69611	0	10
YOR358W	YHR201C	0.69578	0	24
YER171W	YBR034C	0.69567	0	34
YHR143W	YNL085W	0.69562	0	15
YNL056W	YLR438C-A	0.69545	0	57
YLR305C	YGL107C	0.6951	0	18
YNL215W	YOR010C	0.69493	0	10
YPL227C	YNL003C	0.69492	0	27
YGL247W	YPL146C	0.69488	0	30
YBR211C	YOR030W	0.69467	0	39
YNL149C	YOR160W	0.69465	0	21
YGL008C	YLL008W	0.69395	0	23
YNL164C	YLR044C	0.69393	0	8
YBR145W	YKL109W	0.69363	0	20
YFL022C	YIL142W	0.69356	0	21
YLR089C	YEL076C	0.69346	0	28
YGL136C	YNL206C	0.69328	0	24
YDR121W	YOR174W	0.69296	0	31
YBR181C	YIL164C	0.6927	0	14
YNL273W	YGL014W	0.6925	0	33
YDR081C	YPR132W	0.69224	0	11
YDR322W	YDL033C	0.69199	0	32
YER095W	YKL028W	0.69195	0	34
YGR192C	YHL002W	0.6919	0	26
YDR392W	YIL115C	0.69148	0	54
YER147C	YBR059C	0.69145	0	19
YCR081W	YDR260C	0.69123	0	12
YLR393W	YIL110W	0.69107	0	20
YBR084W	YCL052C	0.69106	0	13
YNL206C	YDL132W	0.69105	0	25
YLR104W	YBR290W	0.69079	0	8
YLR207W	YPL037C	0.69056	0	12
YPL036W	YJL010C	0.69054	0	20
YDL015C	YCL005W	0.69038	0	25
YOL051W	YDL139C	0.69021	0	10
YKL135C	YNL219C	0.69004	0	11
YBR236C	YPR031W	0.68983	0	19
YDR439W	YKL179C	0.68965	0	25
YDR454C	YJL030W	0.68957	0	32
YNL071W	YDR398W	0.68935	0	22
YAL032C	YNL224C	0.68916	0	16
YER086W	YLR238W	0.68911	0	15
YHL007C	YOR257W	0.68875	0	8
YBR094W	YDR498C	0.68852	0	20
YDR369C	YMR273C	0.68836	0	31
YPL063W	YDL226C	0.68822	0	21
YMR314W	YIL062C	0.68807	0	22
YKL144C	YGL143C	0.68787	0	17
YGL059W	YJL124C	0.68768	0	37
YLR388W	YKL075C	0.68631	0	19
YDR124W	YMR037C	0.68627	0	16
YPL217C	YPL119C	0.68606	0	15
YBR262C	YDR430C	0.6856	0	13
YDL156W	YJL023C	0.68556	0	28
YDR032C	YPR191W	0.68484	0	14
YBL076C	YJL204C	0.68478	0	11
YPR167C	YDL020C	0.68475	0	38
YOR381W-A	YML041C	0.68435	0	29
YNL297C	YHR197W	0.68433	0	35
YDR216W	YDR469W	0.68419	0	33
YLR355C	YJR123W	0.68399	0	20
YGL251C	YPR161C	0.68397	0	11
YPR107C	YOR201C	0.68385	0	44
YBL036C	YDR113C	0.68378	0	10
YDL220C	YDR155C	0.68371	1	47
YGL097W	YML048W	0.68348	0	39
YOR066W	YBR070C	0.6832	0	8
YOR354C	YOR262W	0.68313	0	17
YGL179C	YLR186W	0.68311	0	19
YLR415C	YDR331W	0.68289	0	18
YLL024C	YPL150W	0.68277	0	20
YMR077C	YER173W	0.68238	0	19
YHL022C	YDR118W	0.6822	0	3
YNL082W	YNL049C	0.6822	0	17
YGL076C	YNL207W	0.68193	0	6
YML085C	YJL183W	0.68179	0	18
YOR147W	YHR086W	0.68177	0	20
YPL189C-A	YML129C	0.68135	1	17
YDR288W	YLR016C	0.68132	0	16
YIL105C	YKR068C	0.68122	0	32
YKR046C	YBR238C	0.68088	0	22
YFL022C	YOL064C	0.68076	0	18
YBL071W-A	YCR102C	0.68022	0	10
YIL109C	YLR153C	0.68016	0	33
YMR035W	YDR448W	0.68016	0	27
YLR045C	YIR022W	0.6801	0	75
YMR076C	YPL203W	0.67998	0	23
YCL025C	YCR102C	0.67937	0	11
YBL075C	YLR298C	0.67937	0	40
YPR074C	YJR070C	0.67901	0	27
YPR171W	YJL204C	0.67899	0	11
YHR072W-A	YML064C	0.67881	0	20
YOR308C	YPL106C	0.67875	0	44
YNL005C	YDR276C	0.6786	0	31
YMR011W	YAL058W	0.67814	0	10
YER129W	YPL135W	0.6781	0	11
YOR087W	YJL151C	0.67809	1	7
YLL015W	YPR173C	0.67793	0	22
YGR162W	YGR140W	0.6775	0	32
YLR262C	YBR028C	0.67726	0	32
YDL171C	YBR181C	0.67723	0	26
YDR464W	YMR070W	0.67721	0	39
YHR174W	YKL045W	0.67716	0	17
YFR037C	YOR265W	0.67701	0	45
YDR153C	YKR095W	0.67676	0	15
YPL129W	YJL050W	0.67674	0	23
YNL118C	YHR152W	0.67654	0	28
YBR092C	YER118C	0.67629	0	10
YGR206W	YIL140W	0.67627	0	14
YGL087C	YOR259C	0.67613	0	66
YJR085C	YKR091W	0.67596	0	6
YBR290W	YNL119W	0.67575	0	30
YBL052C	YJR041C	0.67572	0	18
YOR381W	YML105C	0.67549	0	10
YCR028C-A	YBR082C	0.67527	0	63
YNL290W	YFR009W	0.67481	0	17
YGL012W	YDR002W	0.67466	0	25
YDR059C	YDL003W	0.67464	0	4
YGR264C	YIL061C	0.67455	0	11
YOR260W	YPL154C	0.67408	0	25
YPL077C	YKL101W	0.67397	0	23
YPL004C	YKL021C	0.67357	0	26
YER012W	YDR186C	0.67337	0	23
YLR384C	YJR070C	0.67334	0	50
YML110C	YMR030W-A	0.67299	0	12
YPL023C	YHR082C	0.67289	0	15
YML103C	YGR027C	0.67284	0	79
YML012W	YKR018C	0.67276	0	22
YPR155C	YJL148W	0.67262	0	14
YML097C	YPL105C	0.67243	0	23
YMR028W	YOL009C	0.67214	0	60
YDR180W	YMR283C	0.67206	0	16
YNR053C	YMR243C	0.67124	0	21
YLR452C	YNL106C	0.67093	0	27
YNL181W	YPL146C	0.67069	0	81
YOR035C	YDR057W	0.67054	0	14
YDR494W	YGL115W	0.67035	0	49
YJR136C	YKR031C	0.67016	0	9
YGL222C	YHR035W	0.6701	0	8
YPL049C	YEL003W	0.66989	0	35
YPL154C	YDL047W	0.66979	0	5
YEL051W	YML123C	0.66955	0	24
YER036C	YDR120C	0.66927	0	12
YJL174W	YJL151C	0.66927	0	15
YFL045C	YBR049C	0.6691	0	59
YGR065C	YER117W	0.66899	0	15
DECOY227	DECOY240	0.66891	0	0
YOR094W	YKL203C	0.66859	0	33
YLR289W	YEL076C	0.66853	0	9
YPL270W	YOR070C	0.6673	0	53
YDR472W	YJL062W-A	0.66729	0	18
YER134C	YPL155C	0.66714	0	7
YOR034C	YDR320C	0.66701	0	12
YPR052C	YLR394W	0.66677	0	14
YBR291C	YER040W	0.66653	0	35
YLR424W	YLR007W	0.66648	0	18
YOR296W	YLR182W	0.66629	0	27
YHR065C	YBR095C	0.66588	0	26
YLR220W	YCL008C	0.6658	0	28
YDL181W	YPL262W	0.66569	0	11
YIL151C	YER092W	0.66537	0	18
YIR016W	YDR082W	0.66531	0	10
YMR078C	YBL054W	0.66522	0	24
YJL168C	YPL250C	0.66512	0	44
YPL051W	YDR178W	0.66511	0	12
YNL121C	YDL248W	0.66487	0	30
YOR069W	YLL028W	0.66456	0	23
YHL031C	YKL051W	0.66385	0	16
YPR128C	YEL002C	0.6638	0	29
YEL062W	YGL153W	0.66377	1	23
YOR030W	YFR014C	0.66369	0	26
YKR036C	YKR046C	0.66364	0	12
YER091C	YAL040C	0.66361	0	14
YER017C	YDR397C	0.66348	0	37
YKL012W	YFR031C	0.66344	0	6
YKL096W-A	YPL240C	0.6634	0	25
YPR089W	YDL107W	0.66332	0	18
YGR181W	YPL224C	0.66295	0	6
YNL294C	YKL027W	0.66292	0	33
YHR075C	YGR085C	0.66291	1	13
YNL215W	YBL071W-A	0.66289	0	36
YLR273C	YDR127W	0.66282	0	12
YER095W	YJL106W	0.66244	0	45
YOR068C	YGR130C	0.66242	0	21
YNL242W	YPL135W	0.66218	1	24
YGR092W	YJR010C-A	0.6621	0	26
YHR085W	YDR325W	0.66203	0	24
YBR175W	YOR113W	0.66199	0	37
YHR186C	YOR142W	0.66176	0	13
YJL110C	YMR100W	0.6616	0	29
YPL020C	YAL036C	0.66122	0	16
YCL008C	YIL110W	0.66108	1	25
YGL070C	YPR094W	0.66107	0	9
YHR027C	YBR047W	0.66025	0	18
YLL014W	YOR078W	0.66007	0	24
YGL242C	YOR116C	0.65996	0	12
YBR070C	YAR002W	0.65985	0	43
YBR267W	YDR092W	0.65979	0	43
YNL241C	YFR013W	0.65969	0	14
YHR168W	YBR139W	0.65944	0	4
YBR103W	YDR047W	0.65931	0	29
YNL076W	YMR072W	0.65925	0	21
YGR202C	YJR143C	0.65916	0	5
YPL221W	YLR110C	0.65896	0	12
YDR275W	YGR188C	0.65886	0	17
YGR028W	YOL004W	0.65836	0	36
YJR043C	YMR175W-A	0.65827	0	10
YGR279C	YIL090W	0.65746	0	33
YNL048W	YOR014W	0.65731	0	19
YNL229C	YBR086C	0.65721	0	25
YDR349C	YNL158W	0.65719	0	6
YHR170W	YGL212W	0.65716	0	37
YNL250W	YHL030W	0.65695	0	35
YGL086W	YGL091C	0.6569	1	38
YOL066C	YLL009C	0.65674	0	15
YMR080C	YLR025W	0.6566	0	17
YPL096C-A	YDL150W	0.65658	0	19
YDL192W	YPR069C	0.65639	0	41
YDL218W	YER125W	0.65574	0	40
YJR005W	YKL212W	0.65527	0	22
YPR040W	YBL078C	0.65517	0	8
YPL170W	YJR074W	0.6551	0	28
YNL128W	YMR078C	0.65493	0	25
YHR190W	YGL200C	0.65448	0	45
YGL124C	YJL130C	0.65425	0	18
YMR001C	YMR216C	0.65423	0	24
YMR089C	YFL016C	0.65423	0	17
YPR020W	YOR297C	0.65413	0	12
YMR030W-A	YER165W	0.65391	0	37
YBL047C	YML114C	0.6539	0	17
YPL051W	YPR159C-A	0.65385	0	20
YJR084W	YDR280W	0.65373	0	16
YJR113C	YKL114C	0.65372	0	5
YHR188C	YAR002W	0.65355	0	72
YNL110C	YNR015W	0.65318	0	2
YOR290C	YAL043C	0.65272	0	13
YKL010C	YHR186C	0.65264	0	26
YFR034C	YCL005W-A	0.6524	0	30
YNL079C	YMR290C	0.65231	0	52
YPR180W	YGL202W	0.65198	0	9
YNL252C	YEL069C	0.65169	0	25
YIL039W	YER144C	0.6516	0	7
YDR208W	YOL054W	0.65159	0	17
YDR362C	YBR004C	0.65158	0	11
YDL206W	YCL045C	0.6515	0	5
YKR072C	YPR104C	0.65143	0	30
YLR276C	YCR034W	0.65135	0	36
YCR066W	YML112W	0.65132	1	64
YKL079W	YMR080C	0.65109	0	33
YHL025W	YJL025W	0.65105	0	21
YOR117W	YBR111C	0.65074	0	26
YHR104W	YOR246C	0.65071	0	10
YJL189W	YJL080C	0.65062	0	10
YFR051C	YMR104C	0.65061	0	21
YDR363W	YBR131W	0.65058	1	41
YGR083C	YER083C	0.65055	0	39
YCL043C	YDR079C-A	0.65052	0	27
YPL042C	YDR285W	0.6505	0	11
YDL047W	YGR155W	0.65035	0	15
YPL021W	YBR157C	0.65031	0	3
YMR003W	YBR181C	0.65016	0	27
YMR109W	YIR005W	0.64987	0	33
YGL147C	YOR183W	0.64965	0	17
YLR120C	YJR141W	0.64957	0	21
YML085C	YDR130C	0.64955	0	14
YLR002C	YJL165C	0.64936	0	20
YHR024C	YJL205C	0.6493	0	12
YDL132W	YGR256W	0.64924	0	10
YCR020C-A	YLR197W	0.64918	0	16
YLR148W	YGR217W	0.64899	0	8
YLR115W	YER166W	0.64894	0	26
YNL273W	YIL044C	0.64858	0	18
YDR202C	YDR307W	0.64822	0	12
YLR250W	YDR283C	0.64822	0	9
YBR278W	YOR030W	0.6482	0	43
YBR142W	YGL237C	0.64816	0	21
YNL003C	YOR166C	0.64809	0	7
YDR124W	YOR033C	0.64801	0	6
YPR141C	YDR141C	0.6479	0	37
YLR350W	YHR078W	0.64771	0	31
YKR054C	YKR102W	0.64761	0	6
YOL148C	YBL036C	0.64721	0	3
YNR023W	YDR456W	0.64719	0	30
YPR015C	YGL201C	0.64703	0	7
YFR028C	YDR258C	0.64659	0	18
YML048W	YNR013C	0.64638	0	33
YJR059W	YNL286W	0.64626	0	13
YLR197W	YMR091C	0.64622	0	26
YGL208W	YPL170W	0.64611	1	6
YGL212W	YMR019W	0.64606	0	37
YDR388W	YIL045W	0.64587	0	17
YIL154C	YDL207W	0.64581	0	29
YOR089C	YIR025W	0.64564	0	19
YMR042W	YDR331W	0.64532	1	18
YOR320C	YIL084C	0.64517	0	23
YJL082W	YOR069W	0.64516	0	19
YML105C	YJL082W	0.64512	0	18
YAL012W	YDR463W	0.64506	0	21
YKR039W	YOR241W	0.64505	1	5
YGR083C	YHR008C	0.64463	0	8
YMR201C	YDR056C	0.64444	0	15
YNL015W	YMR277W	0.64408	0	17
YJL062W-A	YHR062C	0.64408	0	24
YGR280C	YJR055W	0.64404	0	5
YML009C	YML094W	0.6438	0	26
YDR175C	YNR051C	0.64366	0	35
YFR001W	YBL026W	0.64356	0	8
YER079W	YBR147W	0.64324	1	4
YOR304W	YOR078W	0.64302	0	35
YNL090W	YJL205C	0.64298	0	8
YKR005C	YPR103W	0.64295	1	15
YBL035C	YLR423C	0.64282	0	14
YIL129C	YDR453C	0.64281	0	17
YLR022C	YDR507C	0.64281	0	26
YNL082W	YMR193W	0.64279	0	4
YLL032C	YIL035C	0.64275	0	28
YGR005C	YLR342W	0.64267	0	53
YDR317W	YLR347C	0.6424	0	8
YBR110W	YGR158C	0.64226	0	16
YBR111W-A	YPR047W	0.64149	0	15
YDR302W	YLR285C-A	0.64089	0	11
YPR112C	YLL005C	0.64076	0	10
YGR035C	YNL329C	0.64067	0	3
YDR414C	YBR082C	0.64063	0	68
YML047C	YDL087C	0.64018	0	18
YDL054C	YJR044C	0.64011	0	9
YOR334W	YDR395W	0.63986	0	18
YHR024C	YLL066W-B	0.63976	0	6
YPL171C	YBL055C	0.63961	0	4
YJR068W	YBL036C	0.63921	0	17
YCR003W	YGL142C	0.63908	0	22
YPL050C	YGL206C	0.63902	0	6
YPR141C	YEL054C	0.63901	0	38
YOL021C	YHR190W	0.63888	0	27
YIL020C	YPR110C	0.63867	0	4
YOR210W	YJL057C	0.63852	1	25
YPR135W	YHR144C	0.6385	0	46
YPL178W	YJR005W	0.63841	0	13
YBR048W	YBR058C-A	0.63833	0	38
YDR105C	YJL183W	0.63824	0	26
YDL101C	YDR141C	0.63808	0	31
YOR085W	YJR136C	0.63797	0	37
YGR277C	YGR253C	0.63797	0	21
YJL035C	YJL147C	0.63794	0	9
YBL040C	YPR178W	0.63793	0	33
YER153C	YIL110W	0.63775	0	6
YKL204W	YNL222W	0.63767	0	30
YBL021C	YPR043W	0.63757	0	39
YGL255W	YOR296W	0.63756	0	8
YPL037C	YGL061C	0.63732	0	26
YDR447C	YGL045W	0.63687	0	40
YDL070W	YAL048C	0.63669	0	21
YNL253W	YIL006W	0.63668	0	4
YLR314C	YOL100W	0.63644	0	22
YDR456W	YEL060C	0.6361	0	15
YPL016W	YJR125C	0.63606	0	21
YFR031C-A	YPL016W	0.63586	0	45
YAL003W	YOR369C	0.63583	0	14
YGR044C	YOR360C	0.63542	0	40
YCR036W	YKL157W	0.63532	0	11
YDR366C	YDR434W	0.63491	0	7
YMR167W	YER156C	0.63487	0	10
YIR026C	YLR045C	0.63466	0	34
YHL008C	YHR088W	0.63466	0	13
YDR088C	YOL031C	0.6345	0	24
YPL058C	YGL187C	0.63431	0	4
YNL257C	YML105C	0.63424	0	13
YJL029C	YJL112W	0.63416	0	20
YER110C	YGR237C	0.63377	0	13
YGR175C	YEL013W	0.6336	0	12
YKL179C	YCR088W	0.63339	0	14
YLR120C	YGL008C	0.63337	0	20
YDR189W	YBL009W	0.63328	0	16
YDR392W	YLR166C	0.63319	0	51
YOR005C	YOR275C	0.63308	0	49
YHR082C	YLR278C	0.63281	0	19
YDL203C	YKL047W	0.63262	0	4
YHR008C	YFL034W	0.63238	0	7
YHR088W	YGL043W	0.6323	0	48
YML014W	YDR325W	0.63198	0	19
YFR043C	YOR106W	0.63134	0	17
YLL042C	YPR151C	0.6311	0	5
YOL080C	YPR108W	0.63103	0	19
YLR247C	YFL002C	0.63094	0	34
YEL024W	YLR253W	0.63071	0	12
YDR074W	YGR089W	0.63071	0	66
YMR319C	YLR190W	0.63046	0	13
YOL116W	YCR036W	0.63027	0	12
YMR269W	YML010W	0.63022	0	21
YGL171W	YMR283C	0.63022	0	3
YBL057C	YBR036C	0.63007	0	20
YFR034C	YOR132W	0.62994	0	34
YOR001W	YDR160W	0.62963	0	13
YLR026C	YIL055C	0.62931	0	25
YLR421C	YLL003W	0.62923	0	4
YFR021W	YBR011C	0.62918	0	31
YPL013C	YMR224C	0.62902	0	13
YBL085W	YDR439W	0.62891	0	21
YNL201C	YPL161C	0.62882	0	26
YJR025C	YER083C	0.62882	0	34
YGL206C	YLR050C	0.62853	0	4
YDL101C	YLR025W	0.6285	0	20
YLR218C	YER139C	0.62836	0	24
YLR433C	YFR051C	0.62778	0	24
YGL215W	YHR012W	0.62775	1	54
YGL215W	YHR012W	0.62775	0	54
YMR070W	YPL141C	0.62774	0	20
YFR012W	YNL199C	0.62772	0	11
YJR057W	YDL121C	0.62768	0	16
YNL202W	YJL062W-A	0.62727	0	4
YNL088W	YLR332W	0.62716	0	24
YJL080C	YDR176W	0.62714	0	12
YPL093W	YBR040W	0.62699	0	12
YJL129C	YCR068W	0.62689	0	10
YCL059C	YNR045W	0.62683	0	25
YJR102C	YDR419W	0.62677	0	7
YLR381W	YOR020C	0.6262	0	26
YNL232W	YPR165W	0.62594	0	30
YNR023W	YOR072W-B	0.62572	0	14
YGL160W	YML128C	0.62567	0	18
YDR196C	YCL001W	0.6255	1	31
YKL051W	YFL039C	0.62534	0	47
YMR091C	YKL048C	0.62527	0	25
YML102W	YOR083W	0.62524	0	34
YBL059W	YDL087C	0.62513	0	5
YOR156C	YGL238W	0.62504	0	18
YGR083C	YLR182W	0.62497	0	33
YOR073W	YDR116C	0.62491	0	20
YBR109C	YDL235C	0.62455	0	30
YER007W	YJR147W	0.62441	0	10
YOR270C	YJR064W	0.62402	0	26
YDR456W	YOR194C	0.6239	0	34
YGL113W	YGR240C	0.62388	0	20
YKL185W	YKL112W	0.62354	0	44
YGR208W	YIR019C	0.62347	0	17
YML081C-A	YPR094W	0.6234	0	21
YGL247W	YGR227W	0.62337	0	22
YIL038C	YLR388W	0.62298	0	19
YNL186W	YFL045C	0.62287	1	32
YOR351C	YPL174C	0.6228	1	28
YOR361C	YDR189W	0.62279	0	26
YMR073C	YHR186C	0.6222	0	31
YDR335W	YIL026C	0.62219	0	17
YDR436W	YHR025W	0.62218	0	10
YMR067C	YOL001W	0.62184	1	64
YNL214W	YJL062W-A	0.6216	0	14
YGL043W	YFR031C-A	0.62139	0	67
YOR381W	YPL194W	0.62125	0	8
YDR142C	YJL148W	0.62124	0	15
YPL227C	YPL144W	0.62105	0	38
YLR356W	YPR107C	0.62096	0	42
YNL020C	YOL081W	0.62091	0	48
YMR077C	YDR409W	0.62049	0	21
YDR192C	YLR048W	0.6199	0	19
YNL315C	YOR005C	0.61986	0	43
YLR423C	YGL133W	0.61976	0	22
YML053C	YIL046W	0.61973	0	20
YKR077W	YOL115W	0.61957	0	13
YER086W	YNL099C	0.61929	0	16
YOR043W	YMR009W	0.61906	0	18
YOL093W	YHR203C	0.61857	0	14
YCR003W	YPL075W	0.61854	0	6
YLR262C	YHR199C	0.61823	0	36
YKR018C	YNL257C	0.61809	0	7
YOR099W	YLR440C	0.61786	0	17
YDL100C	YDR258C	0.61773	0	12
YPL242C	YDL049C	0.61767	0	6
YMR216C	YCL009C	0.61754	0	21
YFR014C	YOR035C	0.61728	0	30
YJR044C	YLR083C	0.61724	0	8
YDR294C	YMR322C	0.61724	0	5
YLR373C	YGR055W	0.6172	0	38
YMR293C	YPR101W	0.61702	0	35
YDR485C	YBL059W	0.61701	0	35
YNL106C	YHR151C	0.61691	0	18
YOR236W	YMR129W	0.61681	0	22
YLR205C	YML017W	0.61676	0	10
YLR335W	YGL099W	0.61672	0	10
YOR354C	YBL098W	0.61669	0	5
YPR016C	YJR085C	0.61665	0	23
YOR056C	YPL042C	0.61632	0	44
YPL152W	YKL087C	0.6163	0	21
YGR038W	YPL109C	0.61627	0	8
YLR084C	YPL056C	0.61602	0	4
YIL034C	YBR127C	0.61559	0	18
YPR052C	YLR096W	0.61537	0	13
YNL307C	YMR188C	0.61535	0	9
YOR312C	YNL127W	0.61452	1	16
YGL120C	YJR134C	0.6145	0	18
YJL030W	YDL122W	0.6144	0	25
YOR207C	YLR455W	0.61434	0	9
YGR245C	YML014W	0.61431	0	10
YIL038C	YBL043W	0.61408	0	5
YHR067W	YIL071C	0.61404	0	10
YOR329C	YML006C	0.61401	0	4
YIR023W	YAL054C	0.61353	0	13
YGL040C	YLL006W	0.61352	0	16
YDR488C	YPR117W	0.61346	0	16
YHR076W	YGR040W	0.61338	0	8
YER162C	YBR085W	0.61318	0	23
YOR311C	YIR027C	0.6131	0	7
YBR246W	YNL255C	0.61306	0	33
YBR141C	YOR070C	0.61294	0	30
YAL038W	YNR054C	0.61254	0	7
YML017W	YJR013W	0.61203	0	24
YER173W	YGL121C	0.61188	0	9
YDR076W	YHR012W	0.61177	0	46
YLR154C-H	YGL124C	0.61169	0	37
YHR077C	YJL057C	0.61143	0	21
YLR203C	YPL132W	0.61104	0	16
YLR426W	YHR108W	0.61097	0	20
YOR360C	YML113W	0.61052	1	28
YBR183W	YLR397C	0.61039	0	11
YCR020C-A	YHR031C	0.61018	0	25
YEL031W	YBR291C	0.60982	0	32
YOR157C	YOR310C	0.60979	0	15
YHL014C	YMR267W	0.60964	0	10
YEL051W	YIL016W	0.60963	0	30
YDR339C	YNL317W	0.60924	0	4
YNL113W	YGR143W	0.60908	0	22
YPL169C	YPR033C	0.60894	0	25
YER157W	YDR314C	0.60891	0	18
YKL108W	YPL007C	0.60858	0	4
YOL063C	YKL009W	0.60807	0	8
YDR052C	YLR325C	0.60794	0	56
YBR179C	YNL080C	0.60793	0	31
YOR171C	YNL272C	0.60775	0	24
YBR231C	YDR135C	0.60761	0	25
YGL092W	YBL008W-A	0.60752	0	7
YDL014W	YGL113W	0.60746	0	35
YDR167W	YGL054C	0.60741	0	56
YLR118C	YML049C	0.60731	0	7
YBR073W	YIL021W	0.60728	0	31
YLR205C	YDL138W	0.60719	0	6
YHR072W-A	YGR006W	0.60717	0	22
YJL210W	YPR098C	0.60695	0	6
YHR021C	YKL121W	0.60684	0	21
YPR160W	YNL056W	0.60641	0	27
YDR339C	YER112W	0.6064	0	14
YKL157W	YDR292C	0.6063	0	15
YBR020W	YLR275W	0.6061	0	18
YGR116W	YNL099C	0.60597	0	22
YEL052W	YNL262W	0.60573	0	14
YKR008W	YML088W	0.60569	0	20
YGR255C	YER180C	0.6056	0	7
YEL034W	YDR183W	0.60556	0	32
YBR265W	YDL078C	0.60523	0	11
YDR364C	YJR135W-A	0.60492	0	9
YOR048C	YEL012W	0.60477	0	20
YCR068W	YHR157W	0.60369	0	5
YHR135C	YMR204C	0.60366	0	4
YNL227C	YNL240C	0.60362	0	23
YDL045C	YDR523C	0.60356	0	6
YBL099W	YMR139W	0.60341	0	13
YJL076W	YLR153C	0.60284	0	17
YGL233W	YBR120C	0.60247	0	6
YFR021W	YER052C	0.6023	0	30
YDL125C	YLR441C	0.60225	0	15
YBR123C	YNL127W	0.6022	0	25
YNL164C	YOR308C	0.60216	0	19
YLR320W	YJL205C	0.60197	0	35
YKL208W	YPR176C	0.60187	0	43
YGL087C	YJL137C	0.60175	0	7
YOR103C	YDR435C	0.6014	0	32
YLR080W	YPR024W	0.60129	0	27
YJR085C	YGR140W	0.60075	0	14
YBR231C	YMR110C	0.60066	0	17
YLR028C	YDR067C	0.60064	0	17
YDL156W	YKL007W	0.60041	0	21
YMR294W	YHR083W	0.60022	0	16
YLR174W	YGR174C	0.60021	0	9
YDL147W	YHR080C	0.6002	0	12
YGL043W	YHR151C	0.60001	0	32
YKL106W	YOR261C	0.59973	0	22
YOR204W	YHL010C	0.59972	0	8
YLR026C	YHR105W	0.59972	0	13
YJL035C	YNL049C	0.59969	0	10
YDL217C	YGR238C	0.59965	0	27
YIL044C	YCR010C	0.59924	0	3
YOR031W	YBR218C	0.59911	0	18
YML109W	YOR141C	0.5988	0	30
YHR105W	YGR284C	0.59877	0	9
YJR130C	YKL109W	0.59848	0	5
YNL141W	YJL030W	0.59791	0	43
YCR009C	YKR038C	0.59765	0	27
YKR042W	YJL020C	0.59724	0	28
YPR104C	YGL086W	0.59718	0	41
YGR245C	YMR293C	0.59694	0	10
YDR144C	YDR054C	0.59693	0	21
YGL012W	YMR262W	0.59686	0	3
YLR197W	YGR024C	0.59682	0	16
YEL012W	YEL047C	0.59579	0	4
YGL054C	YAL022C	0.59575	0	13
YPL003W	YER095W	0.59575	0	30
YIL147C	YDR363W	0.59556	0	25
YBR055C	YGL081W	0.59533	0	9
YLR285W	YOR319W	0.59516	0	1
YDR494W	YDR116C	0.59508	0	25
YNL081C	YLR170C	0.59507	0	22
YDR216W	YOR304W	0.59498	0	28
YDL056W	YML001W	0.59497	0	22
YMR154C	YOR087W	0.59483	0	14
YOR201C	YNR023W	0.59423	0	14
YOR179C	YPR152C	0.594	0	14
YGR063C	YDL130W	0.59384	0	22
YGL062W	YKL059C	0.59351	0	9
YOR048C	YDR374C	0.59343	0	11
YIL127C	YCL032W	0.59336	0	13
YJL148W	YMR266W	0.59324	0	9
YBR107C	YEL013W	0.59323	0	20
YNL282W	YFR012W	0.59313	0	6
YCR086W	YHR121W	0.59296	0	43
YDR316W	YBL015W	0.59292	0	28
YHR032W	YOR341W	0.59284	0	9
YLR229C	YPL029W	0.59278	0	19
YKL017C	YGR140W	0.59259	0	19
YNL272C	YJL019W	0.59257	0	29
YKL037W	YMR004W	0.59256	0	12
YGR116W	YGR062C	0.59237	0	18
YHR006W	YOR057W	0.59208	0	20
YGR099W	YHR035W	0.59205	0	18
YDR096W	YKL002W	0.59201	0	25
YDL104C	YLR238W	0.59199	0	14
YDR282C	YPR036W	0.59187	0	9
YKR096W	YLR268W	0.59176	0	60
YPR144C	YDR469W	0.59171	0	23
YLR388W	YJR066W	0.59168	0	24
YNL185C	YPL134C	0.59152	0	6
YOR140W	YOR353C	0.59129	0	37
YMR238W	YER059W	0.59123	0	10
YGR098C	YGR264C	0.59116	1	58
YKL208W	YCL057C-A	0.59102	0	16
YML020W	YML104C	0.591	0	8
YOL004W	YLR437C	0.59096	0	11
YGR185C	YDR113C	0.59087	0	22
YJL013C	YHR098C	0.59082	0	18
YLR067C	YBR010W	0.59067	0	26
YLR095C	YJR093C	0.59066	0	29
YPR019W	YMR129W	0.59054	0	8
YKR008W	YML109W	0.59026	0	21
YER019W	YPL017C	0.58994	0	19
YMR242C	YPL039W	0.5894	0	11
YBR264C	YBR164C	0.58932	0	19
YDL013W	YHR105W	0.58915	0	14
YBR080C	YNL317W	0.58905	0	7
YGR046W	YMR115W	0.58891	0	7
YJL016W	YJL054W	0.5888	0	1
YER079W	YGL098W	0.58871	0	15
YDR244W	YHR129C	0.58854	0	41
YLR264C-A	YBR202W	0.58851	0	14
YDR354W	YDR130C	0.58825	0	18
YHR107C	YNR031C	0.58797	0	57
YNL138W	YKL211C	0.58793	0	20
YLR371W	YBR092C	0.58779	0	16
YKL011C	YNR017W	0.58771	0	13
YER102W	YPL237W	0.58766	0	14
YGR040W	YNL207W	0.58745	0	6
YGR277C	YNL283C	0.58685	0	16
YKR082W	YLR457C	0.58677	0	14
YBR272C	YGR006W	0.5867	0	18
YOL071W	YHR061C	0.58664	0	5
YPR178W	YHR002W	0.58659	0	28
YDR082W	YJL105W	0.58643	0	11
YLR272C	YPL219W	0.58643	0	17
YER014C-A	YDR088C	0.58632	0	13
YMR013C	YLL026W	0.5863	0	20
YKL057C	YLR407W	0.5861	0	13
YNL315C	YER040W	0.58592	0	56
YPL015C	YDR409W	0.58577	0	5
YLR418C	YBR028C	0.58574	0	31
YHR206W	YDR397C	0.5856	0	63
YOR080W	YDL053C	0.58557	0	27
YDL052C	YOL102C	0.58523	0	12
YGR218W	YGR234W	0.58512	0	25
YIR008C	YHR189W	0.58509	0	48
YPL075W	YLR227C	0.58479	0	7
YIL104C	YDR307W	0.58465	0	1
YBR057C	YBR262C	0.5845	0	20
YHL029C	YNL291C	0.58408	0	21
YOR311C	YMR008C	0.58402	0	9
YER040W	YKR042W	0.584	0	35
YAL025C	YDR163W	0.58356	0	16
YLL042C	YOR006C	0.5835	0	8
YBL024W	YLR033W	0.58338	0	21
YJL085W	YHR151C	0.58309	0	40
YKL208W	YJL219W	0.58291	0	3
YHR079C	YGL213C	0.58288	0	42
YDR275W	YDR287W	0.5827	0	1
YHR069C	YLR017W	0.58241	0	11
YLR226W	YMR102C	0.58183	0	4
YML092C	YBR189W	0.58179	0	16
YIL110W	YJL099W	0.58175	0	15
YPL043W	YDL167C	0.58174	0	13
YJR113C	YLR323C	0.58172	0	9
YCL027W	YPL152W	0.58163	0	10
YOR312C	YNL003C	0.58162	1	14
YBR261C	YPL174C	0.58137	0	20
YKR013W	YOR117W	0.58083	0	11
YDR116C	YFR011C	0.58078	0	32
YJL131C	YMR275C	0.58069	0	15
YOR311C	YER098W	0.58052	0	17
YOR036W	YNR019W	0.58041	0	9
YGL255W	YBR077C	0.58027	0	11
YPL172C	YBR166C	0.58011	0	18
YGR122W	YBR092C	0.58009	0	7
YPR152C	YDL248W	0.58002	0	25
YLR260W	YKL206C	0.57994	0	13
YHR123W	YKL144C	0.5799	0	10
YOR032W-A	YHR062C	0.57967	0	13
YHR073W	YNL291C	0.57941	0	10
YLR071C	YCL057C-A	0.57903	0	19
YBL015W	YJL039C	0.57896	0	9
YCR088W	YMR298W	0.57894	0	19
YGL196W	YHR134W	0.57886	0	8
YNL049C	YNL245C	0.57885	0	41
YBR257W	YIL073C	0.5788	0	10
YGL035C	YBR142W	0.57861	0	27
YLR367W	YGL240W	0.5786	0	20
YKL160W	YNL090W	0.57843	0	15
YIL051C	YCL050C	0.57828	0	6
YNL134C	YDR090C	0.57807	0	5
[truncated: 611 more rows]
