# Supplementary material for: GNE: a deep learning framework for gene network inference by aggregating biological information
Source: BMC Syst Biol. 2019 Apr 5;13(Suppl 2):38. doi: 10.1186/s12918-019-0694-y (PMC6449883; doi:10.1186/s12918-019-0694-y)
Supplement: Supplementary file 2 — Table S2. Includes E. coli gene pairs predicted by GNE with probabilities of 0.5 or higher. Rows marked with yellow color indicate predicted interaction is true based on latest version 3.4.162 of BioGRID interaction dataset released on June 2018. (XLSX 43.7 kb) [file 12918_2019_694_MOESM2_ESM.xlsx]

## Sheet: Sheet1
Table S2: Ecoli Gene pairs predicted by GNE with probabilities of 0.5 or higher. Number of Common neighbors is the number of shared interacting genes between a gene pair. Rows marked with yellow color indicate predicted interaction is true based on latest version 3.4.162 of BioGRID interaction dataset released on June 2018.
Gene A	Gene B	Probability	True interaction	Number of common neighbors
gspD	fimD	0.99983	0	58
yhcB	fecE	0.99946	1	142
ubiF	mltB	0.99943	0	91
rpmA	ackA	0.99935	1	107
ubiE	secG	0.99919	1	191
yegD	gdhA	0.99919	0	42
ycfL	sapF	0.99903	0	123
lspA	sapA	0.99895	0	58
yebG	ygcI	0.99895	1	101
btuB	yhjE	0.99891	0	83
ycbX	clpA	0.99891	1	110
fepA	lolC	0.99891	0	95
iscS	fabD	0.99875	1	174
fliR	kdsA	0.99865	0	119
srmB	yfbL	0.99844	1	29
oppA	idnD	0.99837	0	108
ybeX	cydA	0.99824	0	248
pta	nanA	0.99798	0	155
pbpC	ftsZ	0.99795	0	113
ttdB	sapF	0.9979	0	37
rssA	paaD	0.99781	0	47
pbpC	frlB	0.99777	0	50
damX	fliL	0.99765	1	320
hokD	yebG	0.99748	1	47
fepC	yqcE	0.99724	0	70
ybaT	betT	0.99699	0	32
caiT	yhhH	0.99698	0	95
yhhS	dicF	0.99693	1	56
hofC	sapF	0.9969	1	79
mdtF	caiT	0.99678	0	112
degP	ybiV	0.99664	0	81
ddpB	ygcL	0.99664	0	21
gspK	sapF	0.99659	1	161
mltD	lamB	0.9964	0	87
ydeA	yidK	0.99638	0	93
murA	mdtC	0.99628	0	79
mreB	thiM	0.99621	0	34
tolC	ampG	0.99616	0	85
rfaJ	emrB	0.99614	0	51
ubiE	btuB	0.99593	1	148
ybiO	ispE	0.99566	0	61
yhjR	pldB	0.99563	0	74
gspJ	kdsC	0.99556	0	109
mcrA	yraK	0.99551	0	35
mltB	ompN	0.99547	0	127
gmd	yafL	0.99539	0	57
ydgA	yfeO	0.99536	0	80
pepT	narW	0.99514	0	6
ydhJ	blc	0.99486	0	88
phoE	ydiO	0.99472	0	100
crcB	parE	0.99448	0	72
wbbI	ycfP	0.99438	0	81
dppF	macA	0.99435	0	139
wbbK	fabZ	0.99429	1	121
yceK	mipA	0.99425	0	90
frdD	hybO	0.99397	0	27
ybfN	ampD	0.99369	0	29
yrbL	ynfM	0.99368	0	19
holC	dnaT	0.99338	0	75
mdtE	gspE	0.99338	0	102
oppC	mrdA	0.99335	0	148
sohA	ybgP	0.99333	1	72
glpD	pbpC	0.9933	0	91
pabA	gph	0.99329	0	3
maoC	yqiG	0.99318	0	36
dipZ	tatC	0.99316	1	144
fadA	rhsD	0.99313	0	47
yiiU	clpX	0.9931	0	30
gltB	idnD	0.99307	0	70
yhfU	ynjE	0.99286	0	43
macA	yehU	0.99282	0	100
pgpB	trg	0.99272	1	70
dppD	yebA	0.99264	1	90
efp	ybaY	0.99257	0	62
cydB	gspK	0.99252	1	142
cld	tolC	0.99229	0	143
recD	polB	0.99228	0	41
wza	agaS	0.99214	0	122
flgA	yfiB	0.99206	0	78
hflC	lysS	0.99203	0	34
rfaJ	cyoA	0.99191	1	57
ubiH	folE	0.99189	0	135
yceK	yeiW	0.9918	0	107
nagZ	holA	0.99177	0	12
fimC	tolB	0.99174	0	93
bcsB	fliL	0.99146	1	175
cyoA	tpx	0.99068	0	37
rssA	yagX	0.99036	0	71
yjhF	fcl	0.99027	0	83
rfaB	ybfN	0.99009	0	65
oppF	thiM	0.99005	0	34
yihN	sfmC	0.98997	0	50
ymgF	lamB	0.98969	0	105
dnaK	mutT	0.98958	0	32
ygeO	rpsE	0.9895	0	24
lepA	chiA	0.98944	0	84
yajI	bcsA	0.98922	0	101
era	rssA	0.98907	0	72
paaE	wcaC	0.98901	1	66
ytfF	ygeO	0.98858	0	24
cirA	paaF	0.98843	0	22
rffC	mpl	0.98831	1	67
napD	murA	0.98825	1	83
cheB	fecA	0.9882	1	64
acpP	yhjD	0.98784	1	272
yeaN	gspA	0.98783	0	80
ybhI	yegE	0.9877	0	55
yjbF	mpaA	0.9872	0	66
ydfD	yqgF	0.98696	1	57
cusA	ycfP	0.98695	1	91
dcrB	clpX	0.98693	0	25
ftsE	oppB	0.98641	0	133
ybjP	ygiT	0.98641	0	6
tolB	yfcE	0.98638	0	33
glgC	envC	0.98611	0	68
ispA	dppA	0.98583	0	61
galT	cls	0.98579	0	142
secD	yeiW	0.98572	0	99
osmC	acrD	0.98556	0	130
mscL	ldcA	0.9851	1	154
hofC	nlpC	0.98491	0	64
secD	lpxH	0.98487	0	62
rpmB	yggD	0.98418	0	9
ycjR	ygcI	0.98412	0	3
ompA	aer	0.98412	0	49
yceB	livG	0.984	0	13
ydhK	slyB	0.98384	0	43
ydhJ	fecB	0.98357	0	106
ybbC	pspA	0.98342	0	16
yafL	yidB	0.9833	0	98
yhiM	ydeT	0.98311	0	74
tilS	ykfI	0.98309	0	21
acrE	clpP	0.983	0	46
cydC	ycfM	0.983	0	64
zapA	lolA	0.98276	0	81
rfaP	hybO	0.98246	0	23
rhsA	phoE	0.98225	0	36
ybeY	yciU	0.98137	0	9
paaG	hemY	0.9811	0	61
dppF	glmM	0.98058	0	77
lpxH	rof	0.98057	0	87
yaiP	panE	0.98056	1	105
ynaJ	uvrC	0.98042	0	23
yjcH	cusB	0.98038	0	56
sapD	ybcH	0.97967	0	97
yjiD	yhjQ	0.97955	0	29
yncD	yjdL	0.97955	0	66
ispE	ygfQ	0.97954	0	68
kefA	galT	0.97913	0	121
mreB	ispH	0.97896	0	50
yraK	yhdZ	0.97889	0	6
lolA	lpcA	0.97855	0	81
phoA	ligB	0.97852	0	8
ylbH	gspF	0.97849	0	48
dnaE	ftsW	0.97844	1	75
lnt	ptsH	0.97844	1	113
ung	mukE	0.97804	0	24
yjjA	yidK	0.97773	0	58
agaS	pbpG	0.97626	1	69
btuB	yajI	0.97603	0	115
yraJ	dut	0.976	0	50
alr	ubiB	0.97549	0	88
yddW	lpxK	0.97533	1	66
ydjO	yhhA	0.97513	0	36
yfbS	cyoA	0.97511	1	62
sufD	tar	0.97484	0	12
ompW	htrE	0.97446	0	29
galT	hepA	0.9743	0	39
wzc	ynaI	0.97382	0	58
yncD	rhsE	0.97379	0	54
fepA	mdtK	0.97363	0	63
ygfQ	napD	0.97318	0	68
damX	hfq	0.97313	0	84
rssA	murF	0.97137	0	68
yphE	ydaV	0.97111	0	16
fhuE	mltD	0.97101	0	57
malQ	dgoK	0.97098	0	14
ydhC	gspD	0.97094	0	40
hscA	frdB	0.97075	0	8
ffh	paaD	0.97033	0	37
yhhA	cmtA	0.97027	0	21
aroK	bcsF	0.97007	0	72
mdtI	recC	0.96989	0	121
rph	rpoZ	0.9698	0	6
rsuA	yfcE	0.96937	0	1
napD	yeaV	0.96916	0	54
ygcK	dnaQ	0.96905	0	22
pspE	appC	0.96905	0	34
yjjA	fimC	0.96881	0	89
hslV	ybgP	0.96877	0	20
wzb	rpmA	0.96807	0	88
ysaB	lepA	0.9678	1	9
ybiV	mltC	0.96723	0	87
rfaL	lnt	0.96677	0	48
yqcE	mipA	0.96626	0	52
dsbC	holC	0.96616	0	47
yeeX	ompA	0.96612	0	11
cfa	rmf	0.9661	1	85
yeeS	ruvB	0.9661	0	27
ung	yrdB	0.96608	1	15
gspH	pssA	0.96608	0	52
cedA	ispH	0.9659	0	129
priA	abgT	0.96564	0	16
ybbY	pssA	0.96498	0	50
cydA	yebA	0.96494	1	143
ybhG	ugpE	0.96487	0	58
ytfB	ybaY	0.9646	0	108
fhuC	yraJ	0.96423	0	51
panD	lpp	0.96394	0	41
rfaY	yfdV	0.96382	0	128
secD	cpsG	0.96329	0	69
bolA	ygfU	0.96283	0	19
wcaI	zapA	0.96205	0	60
yfaL	lolB	0.96185	0	103
ygfQ	dacD	0.9618	0	43
fabG	glmM	0.96121	1	70
ydhC	yfiH	0.96059	0	57
ybfM	cpsG	0.96049	0	76
relE	yagS	0.96021	0	32
gyrB	umuC	0.95974	0	62
yhjY	imp	0.95967	1	48
ynjC	yhdE	0.95943	0	76
msbA	rlpB	0.95902	0	63
ygcO	ycfJ	0.95881	0	4
yqaE	helD	0.9587	0	36
ydeK	ypjC	0.95869	1	35
clpB	nlpC	0.95866	0	9
ycfM	ydiN	0.95861	0	61
endA	aidB	0.95828	0	13
mdoB	ydhK	0.95826	0	37
cheZ	lepB	0.95751	0	33
rfaB	rsgA	0.95743	0	38
cedA	pspB	0.95727	0	33
spoT	ubiA	0.95709	1	109
recT	efp	0.95707	0	19
malQ	rdgC	0.95699	0	4
livG	hycA	0.95582	0	2
yqhH	srmB	0.95484	0	45
helD	holE	0.95424	0	18
thrC	envC	0.95399	0	22
yagX	rfbC	0.95393	0	93
yeiH	gdhA	0.95392	0	19
helD	rhlB	0.95376	0	26
panE	murC	0.95336	0	139
ygfQ	fadB	0.95313	0	51
slp	fhuB	0.95278	0	44
tsx	cpsG	0.95276	0	68
ompC	yfdG	0.9526	0	48
ygcJ	ytfB	0.95254	0	76
yidE	ybiV	0.95234	0	47
livG	yhhA	0.95126	0	11
ftsZ	yjiJ	0.95092	0	113
hemX	yfeN	0.95081	0	61
fabB	hemY	0.95012	0	34
exbB	der	0.94993	0	17
ypjC	mutS	0.94899	0	33
eptA	ygiT	0.94892	0	1
vsr	umuD	0.94876	0	25
solA	mfd	0.94823	0	19
rpmA	yqcE	0.94769	0	71
abgT	tig	0.94765	1	57
wbbK	ygbN	0.94728	0	87
murB	dgoK	0.94642	0	19
sohA	yggU	0.94633	0	77
ygbT	cysI	0.94581	0	22
ybdM	kptA	0.94578	0	3
pepN	rsmB	0.9457	0	2
folD	gspH	0.94547	0	67
yrdD	ynjE	0.94468	0	27
recT	fimE	0.9446	0	17
glpD	gspI	0.94404	0	119
bcsZ	lamB	0.9438	0	6
treA	yieG	0.94336	0	56
arnT	yhjV	0.94312	0	65
fhuB	wcaK	0.94253	0	44
paaE	rfbB	0.94204	0	60
glgB	cls	0.94143	0	105
seqA	hokD	0.94138	0	19
rffM	fiu	0.93972	0	47
rimJ	napB	0.93929	0	1
yraN	dnaK	0.93907	0	26
yoaA	rhlE	0.93896	0	10
ispB	yhjV	0.93798	0	39
yafS	mutM	0.93677	0	24
yeeO	ugpA	0.93673	0	50
damX	recQ	0.93658	0	38
cusB	hslR	0.93635	0	11
ugpE	surA	0.9359	0	62
ygjI	yhiI	0.93585	0	45
rhlE	hisS	0.93529	0	6
gyrB	yebV	0.93517	1	34
yjiY	cfa	0.9345	0	56
ycgR	dppF	0.93445	0	42
yfcF	yciU	0.93434	0	4
purB	yeaY	0.93367	0	61
yfcJ	fabG	0.93359	0	100
ybaW	yibJ	0.93315	0	12
dicC	sspB	0.93297	0	4
yhbT	osmY	0.93289	0	71
fliR	cysI	0.93244	0	13
ligA	lpxA	0.93231	1	58
htrL	ompW	0.93195	0	84
ynjD	murC	0.93193	0	48
frdD	rimJ	0.93098	0	5
prmC	pth	0.93013	0	15
aroK	ogt	0.92955	0	49
alkA	ompA	0.92907	0	16
pspF	yfaZ	0.92835	0	34
gmhB	lon	0.92755	0	16
lpxL	rfe	0.92737	0	19
yhbC	acnB	0.92718	0	10
yfgA	yebS	0.92673	0	19
yafW	ygeQ	0.92504	0	11
cedA	manX	0.92485	1	79
ybeX	rnd	0.92469	0	11
dinI	ygjD	0.92457	0	4
yqeI	fepC	0.92373	0	10
yhfT	yiiU	0.92279	1	80
dcp	rsmB	0.92268	0	6
rhlB	yciX	0.9223	0	2
yeiI	lar	0.9222	0	5
tsx	yegE	0.92076	0	65
wzc	lpcA	0.92037	1	79
tig	cheY	0.91992	0	54
ftsX	cdh	0.91894	0	62
secD	tolR	0.91822	0	49
ptsI	ydjK	0.91813	0	57
flgJ	lpxL	0.91795	0	6
rffG	ygdL	0.91713	0	55
panF	yedE	0.91683	0	64
ydhJ	fkpB	0.91609	0	23
mutS	gltB	0.91557	0	14
hslV	fepB	0.91455	0	31
rpoD	ynjE	0.91441	1	69
yghD	ycgJ	0.91424	1	5
glpQ	ybjI	0.91394	0	57
dinJ	mdtI	0.91339	0	17
rng	slt	0.91257	0	13
ftsL	glpQ	0.91251	0	68
htpX	ssb	0.91248	0	3
ynjF	garD	0.91162	0	1
ybjJ	wzxE	0.91159	0	50
dsbG	dgkA	0.9112	0	40
yggU	dsbA	0.91102	0	32
ydjO	yjeI	0.91082	1	32
ygaD	ybgP	0.91037	0	37
tyrA	cspC	0.90938	0	4
yeeR	recF	0.90933	0	38
acpT	ycbC	0.90835	0	27
rfaE	recQ	0.90662	0	25
ylbH	macB	0.90632	0	54
hda	recC	0.90574	1	66
ibpA	btuF	0.90547	0	8
gdhA	yjeP	0.90484	1	51
malQ	ypjA	0.90477	0	6
ycbS	ydiS	0.9041	0	12
emrD	era	0.90368	0	30
betT	lpxA	0.90205	0	67
acpT	crcB	0.90152	0	46
ygeO	tdk	0.90074	0	69
rimJ	sbcB	0.90074	0	7
pheS	yifL	0.89932	0	8
speE	panF	0.89926	0	13
murE	fis	0.89835	0	34
asnB	hokE	0.89599	0	18
btuC	sfmD	0.89451	0	58
yraJ	folD	0.89431	1	37
yhfY	pspE	0.89391	0	23
yajR	fhuA	0.89263	1	33
pabA	gltB	0.89245	0	13
ygcH	yjdL	0.89165	0	13
yeeR	dadX	0.89052	0	11
yjgL	ydeN	0.8894	0	0
rsgA	cdh	0.88933	0	19
hybO	yjdL	0.88821	0	7
mutY	sdiA	0.88817	1	50
dsbA	oppA	0.88791	1	64
nuoL	mutT	0.88694	0	3
ydcX	yeeR	0.88659	0	16
rplD	ptsI	0.88648	0	12
mdh	gmhB	0.88596	0	3
mtgA	wcaL	0.88578	0	47
yihD	relA	0.88464	0	10
cyoC	dnaB	0.88409	0	7
truD	yebG	0.88293	0	10
ygfZ	psd	0.88104	0	9
ygbT	fadB	0.8809	0	14
soxS	marA	0.88082	0	37
manX	rpmJ	0.88014	0	6
rhsD	surA	0.87924	0	102
wzxE	nuoL	0.87863	0	2
paaD	pspA	0.87765	0	6
groL	gltD	0.8771	0	28
ybgH	yhjV	0.8762	0	60
ykfC	ydaV	0.87506	0	14
ydjM	rfaE	0.87462	0	14
rpmG	sdhC	0.87232	0	3
ydeK	glpF	0.87202	0	38
rpmB	ypjC	0.86945	0	47
entA	lpxH	0.86882	0	58
ftsA	ftsI	0.86849	0	38
bglH	paaK	0.86819	1	56
cirA	ygbT	0.86754	0	9
dnaE	yghD	0.86675	0	56
gspA	thrA	0.86667	0	18
yihA	yiaV	0.86561	1	82
mdtI	yfaA	0.86542	1	67
frr	yccS	0.86522	0	7
napF	mazG	0.86471	0	0
dacC	ldcA	0.8647	1	86
htpX	pnp	0.86448	0	2
wzxE	paaC	0.86444	0	47
topA	dbpA	0.8641	0	18
yaaU	dnaB	0.86021	0	11
yceF	yjjM	0.8595	0	42
hslU	ydfD	0.85917	0	12
kdsD	yjjB	0.85898	0	29
surA	nth	0.85867	0	18
ydcK	lpxA	0.85819	0	49
ytfN	yddB	0.85735	0	107
yfhM	emrK	0.857	0	44
dxr	mdoC	0.8566	0	69
murI	recC	0.85596	0	27
ydiS	dppD	0.85458	0	16
ftsX	ydaE	0.85355	1	72
ybcK	rnr	0.8529	0	2
yrbL	rffE	0.85124	0	34
yeeX	hepA	0.84862	0	2
potG	gntT	0.84783	0	0
chiA	ydjH	0.84736	0	6
rfaZ	pheS	0.84701	0	14
secD	micF	0.84438	0	71
ydiY	gspF	0.83972	0	37
rpoH	oppB	0.83847	0	11
yaeQ	npr	0.83772	0	3
ftsK	yajI	0.83642	0	110
polB	mutL	0.83615	0	6
thrA	ppk	0.83556	0	1
yciH	ppdB	0.83446	0	2
cbpA	hypA	0.83243	1	3
ibpA	rfaL	0.83239	0	7
yciO	hybD	0.83161	0	4
ygbT	yciX	0.83052	0	7
nuoL	zapA	0.83041	0	7
yhcH	ttdB	0.82975	0	5
htpG	glpA	0.82436	0	17
yciO	ackA	0.82432	0	5
livG	holD	0.82404	0	14
ycjT	livG	0.82225	0	6
fusA	recN	0.82188	0	5
mltC	ynaK	0.82186	0	40
ybcK	dmsA	0.82065	0	4
chbF	ynaA	0.82001	0	4
gspC	fhuD	0.81991	0	81
yegD	gph	0.81887	0	1
murE	yibJ	0.81879	1	20
gspE	mppA	0.81786	0	116
gdhA	ykfC	0.8177	0	15
yfcE	cysE	0.81744	1	3
mraY	lolD	0.81691	0	80
nudG	ydjA	0.81627	0	37
livG	pepD	0.81594	0	6
ynfG	crr	0.81419	0	0
ygfZ	yadE	0.81402	0	49
pabB	alr	0.8138	0	78
gspC	cheA	0.81341	0	43
fecA	sdhC	0.81291	0	3
iscA	narW	0.81218	0	0
ygiT	yciM	0.8119	0	6
fimD	ftsA	0.81164	0	85
aer	paaD	0.80965	0	5
rfaF	hscB	0.8095	0	6
degP	prpE	0.80941	1	1
bolA	yciH	0.80779	0	7
ydeJ	ygfA	0.80771	0	4
yjjB	hda	0.80501	0	75
ynfM	bcr	0.80466	0	51
cbpA	thiH	0.80314	0	2
yjhB	yeeA	0.80271	0	5
prfA	yhfT	0.80215	0	9
gspL	cfa	0.79891	0	44
ligT	yraP	0.79811	0	21
cbpA	mutL	0.79785	0	7
speE	yfaL	0.79514	0	19
hydN	yjjB	0.79467	0	3
ydfJ	pldA	0.79263	0	73
rplD	cedA	0.79122	0	18
ffh	rpmG	0.78948	0	13
mipA	aroE	0.78898	0	10
pabB	mraY	0.7889	0	71
endA	ygcO	0.78832	0	1
dppB	ybbW	0.78711	0	50
paaD	rpoZ	0.78699	0	10
ybfB	sodA	0.78591	0	16
speE	yfiB	0.78553	0	24
yjjA	metN	0.78489	0	5
artI	ygeQ	0.78445	0	2
dsbC	xthA	0.7839	0	10
nrdB	ygiV	0.78219	0	16
yhcH	napA	0.78167	0	2
yigA	ydhO	0.7816	0	1
yraN	mutL	0.78089	0	5
yggC	acrE	0.78079	0	36
gyrB	ygcH	0.77965	0	46
holA	nuoL	0.77838	0	7
recQ	rfaP	0.77836	0	18
nudE	ycfT	0.77819	1	52
yagM	napA	0.77787	0	3
dipZ	mutH	0.77653	1	49
glyA	yqiB	0.77529	0	4
ynfB	ybeB	0.77498	0	6
ytfN	frdA	0.77214	0	123
ycbX	ydjN	0.7701	0	23
sufB	nanK	0.76904	0	2
ppdB	gutM	0.76902	0	1
nlpE	yiiD	0.76697	0	24
mraZ	relB	0.76522	1	19
ygbF	umuD	0.76364	0	5
ecnA	lnt	0.76163	0	51
rpmJ	ydgI	0.76088	0	17
mdtD	ddlB	0.76007	0	46
moaE	pheS	0.76002	0	4
acpS	hofQ	0.75908	0	2
rffM	glpC	0.75867	0	5
ftsA	rnr	0.75681	1	13
ygeG	ydaW	0.7557	0	5
elaD	livK	0.75503	0	2
asnA	pepN	0.75417	0	2
ylcG	mpl	0.75347	0	15
treF	ynbB	0.75236	0	2
mcrB	tolB	0.75091	0	19
ygiB	yciB	0.75054	0	4
hslR	yqjG	0.75035	0	6
yfcC	ydiY	0.74969	0	86
yqeI	fkpB	0.7475	0	2
ydgI	yebF	0.74637	0	3
ppiA	imp	0.74611	0	11
ygiT	argF	0.7448	0	2
mazG	caiC	0.74088	0	2
rluD	nlpC	0.74048	0	8
nlpC	ycbZ	0.73914	0	4
rpoH	yfjR	0.73909	0	16
rsxE	ycaK	0.73802	0	5
ycbL	tilS	0.73666	0	2
dppF	ygcO	0.73653	0	8
fadB	yjjB	0.73646	0	14
tolC	abgB	0.73616	0	14
pheS	rbsB	0.73534	0	3
napF	kefA	0.73483	0	3
yhhW	proP	0.73404	0	0
ompF	yhaO	0.73382	0	53
aat	tyrB	0.7305	0	1
yqfB	rnr	0.72977	0	4
recO	hisS	0.72952	0	3
ybgJ	ftsX	0.72818	0	79
rluC	aas	0.72783	0	2
yrbB	rpmF	0.7278	0	10
ltaE	hslU	0.72759	0	3
yafO	gmhB	0.72707	0	15
yafP	cca	0.72706	0	1
idnD	ydcF	0.72655	0	4
yegD	mreC	0.72502	0	14
yghB	ydfR	0.72485	0	4
setB	yeaI	0.72367	0	2
yhfW	ahpC	0.72169	0	4
ynfG	yhfZ	0.72016	0	1
topB	ykfG	0.71932	0	4
rpoZ	allC	0.71912	1	5
feoB	glnB	0.71727	0	7
rbsA	frdC	0.71661	0	8
tdcG	aceK	0.71498	0	0
glpC	yggC	0.71481	0	8
yciH	def	0.71388	0	7
yafT	tdcG	0.71262	0	1
nrdE	ygiV	0.71192	0	7
prfB	yfbU	0.71156	0	13
map	miaA	0.71053	0	1
yeaD	yfcH	0.70966	0	1
smtA	spr	0.70952	0	12
recT	mutM	0.70915	0	13
ftsI	yqhH	0.70906	1	22
yjjV	exbB	0.70865	0	20
ompT	ypdI	0.70848	0	42
hycA	kdsC	0.70842	0	0
ydaV	ybeY	0.70817	0	9
nuoM	dnaQ	0.70768	0	4
yeaK	rluD	0.70767	0	4
sufS	trmH	0.70757	0	7
yicR	hybD	0.70751	0	4
yajG	idi	0.70677	0	21
ybaK	hcaB	0.70626	0	0
gspL	accD	0.70529	0	21
slt	cspI	0.70338	0	19
slyX	soxS	0.70306	0	11
ompL	uvrB	0.70204	0	14
truA	mpl	0.70199	0	7
acpP	ycaM	0.70009	0	55
rpmJ	yfjF	0.70003	0	10
nadC	asnB	0.69966	0	2
cydB	ybeB	0.69904	0	11
ynfA	yfbL	0.69779	0	3
dctA	clpA	0.69751	0	3
dadX	yfiQ	0.69721	0	3
fdx	xseA	0.69703	0	2
xseB	ydcP	0.69679	0	3
radA	yafM	0.69664	0	4
uidC	rfaI	0.69618	0	50
yehD	argP	0.69599	0	11
narG	yggW	0.69577	0	4
rhsD	yggD	0.69551	0	6
cca	flxA	0.69528	0	1
acrE	kch	0.69347	0	1
tatC	ygfA	0.69282	0	68
hycC	prfH	0.69221	0	2
pspC	ypdF	0.69082	0	3
yoaH	yhbV	0.69063	0	1
groS	lpxM	0.6904	0	7
acpS	atoD	0.68787	0	2
sbmC	yaiS	0.68767	0	5
syd	yheN	0.68755	0	6
yjgL	racC	0.68661	0	1
exbB	yeeX	0.68469	0	7
ubiA	maoC	0.68424	0	113
phr	spy	0.68422	0	15
elaD	yhjG	0.68383	0	1
ybdM	ydfW	0.68239	0	4
xseB	yqaA	0.67865	0	2
kduI	dnaQ	0.67862	0	5
ygeX	ykfI	0.67676	0	3
yjgH	betT	0.6765	0	2
ygiT	vacJ	0.67583	0	9
yibK	ybhF	0.67506	0	1
cpdA	prfA	0.67333	0	0
ygeY	chbF	0.67146	0	4
ycaR	sufD	0.67128	0	10
ftsB	mdtF	0.66949	0	50
wbbI	pepE	0.66931	0	3
ygiZ	lysS	0.66898	0	2
ade	glnB	0.66745	0	3
ltaE	yodA	0.66706	0	6
yiiU	yggD	0.66677	0	13
plsC	yicR	0.66582	0	18
tdk	rfaG	0.66499	0	12
mdtH	nudE	0.66489	0	66
rsmC	yicH	0.66418	0	2
ygiV	ompA	0.6638	0	26
rdgC	dedD	0.66062	0	15
ddpX	decoy132	0.65999	0	0
adiA	yfeN	0.65991	0	2
rnd	gnd	0.65792	0	0
yhdZ	yfeO	0.65643	0	10
yfjW	ymfJ	0.65638	0	0
yggE	rsmB	0.65507	0	8
prmB	rpoH	0.65498	0	2
intB	rof	0.65455	0	3
fusA	rmf	0.65421	0	15
yedE	yeiH	0.6542	0	56
rbsA	xdhB	0.65419	0	8
ybcN	bcsA	0.6526	0	18
ampH	narG	0.65067	0	5
ppdA	ypjA	0.65048	0	11
ppk	yrbB	0.64864	0	5
prlC	cpsB	0.64807	0	2
stfR	yrbL	0.64726	0	9
dgkA	rplD	0.64617	0	9
sfmC	rng	0.6454	0	7
hisS	asnC	0.64529	0	7
metK	gspL	0.64398	0	34
modF	guaB	0.64263	0	6
yddK	yehB	0.63933	0	3
csdA	cmtA	0.63905	0	12
ygbK	yqiG	0.63904	0	2
kduD	ftsK	0.63884	0	4
asnB	yehP	0.63859	0	11
ugpE	nth	0.63797	0	15
rpoH	ykgJ	0.63702	0	4
ycgF	ybaS	0.63441	0	1
ampG	acnB	0.6342	0	8
tbpA	ygjD	0.63318	0	1
fdx	galT	0.63279	0	4
yaiV	gltD	0.63221	0	9
pstC	greA	0.63102	0	3
ycjN	yehB	0.63014	0	6
mrp	hda	0.62864	0	16
sugE	pspA	0.62841	0	12
mdoG	aroH	0.62795	0	1
gdhA	ycbJ	0.62758	1	3
accD	dnaQ	0.62457	0	8
puuA	yciE	0.62451	0	3
pspA	ymgG	0.624	0	3
csdA	hcaF	0.62358	0	8
manX	yhbX	0.62323	0	2
nfrB	hepA	0.62313	0	7
zraS	yeeA	0.6228	0	1
lpp	ycgL	0.62278	0	13
ispH	yciV	0.62218	0	5
sbcB	ykgE	0.62172	0	3
gatD	yieG	0.62091	0	4
fkpB	rarA	0.62076	0	8
nuoM	umuC	0.61936	0	7
ykgE	vacJ	0.61903	0	3
pth	ycbR	0.61888	0	5
ygfT	yraL	0.61843	0	1
frvB	yaiV	0.61825	0	2
yliG	lipB	0.61768	0	1
nudB	yafO	0.61597	0	16
ftsK	cmtA	0.61418	0	29
yqiH	hchA	0.61399	0	2
trg	fkpB	0.61332	0	14
rumA	ycbC	0.6132	0	12
fdoI	yjgQ	0.61228	0	5
yjfK	cusC	0.61154	0	0
accC	ybdM	0.61141	0	2
nrdB	nuoA	0.61038	0	1
ydjH	rhsA	0.6103	0	6
yodA	rluC	0.60952	0	1
holA	ygcS	0.60871	0	7
fliM	mhpF	0.60836	0	3
adiA	thrC	0.60807	0	0
bolA	manA	0.60551	0	33
ygeO	mdtG	0.60431	0	3
pspE	valS	0.60304	1	0
thiM	yddH	0.6004	0	1
stfR	yfdF	0.59978	0	11
lysA	recT	0.59685	0	2
yidB	truD	0.59661	0	1
gcvP	nlpC	0.59659	0	4
yccJ	wcaA	0.59439	0	2
yifB	ysaB	0.59399	0	1
ybeQ	yihP	0.59388	0	3
yqiH	pepE	0.59339	0	2
yjaB	hybO	0.59271	0	3
yiiM	ybhR	0.59251	0	2
marR	ygjD	0.59143	0	4
cynS	cmr	0.59099	0	0
yhbX	wzb	0.58994	0	3
clpP	lacA	0.58979	1	4
rarA	mipA	0.5895	0	3
iscR	glgA	0.58904	0	14
hycH	prmB	0.58891	0	1
ispB	yggD	0.58709	0	5
appC	yqeB	0.58702	0	2
ydgI	ydfR	0.5855	0	6
napA	yafO	0.58366	0	8
uvrD	intB	0.58365	0	0
garK	nikA	0.58358	0	4
ygfJ	fepE	0.58239	0	13
citD	sgbH	0.58227	0	0
ychM	yehE	0.58218	0	25
malQ	ygaY	0.58186	0	5
ybhR	yaaU	0.58157	0	3
yrbA	btuB	0.58128	0	0
yfjP	ygjD	0.58107	0	3
rplD	rfaC	0.58094	0	22
nuoB	ppdC	0.5806	0	0
yfeT	yqiG	0.58036	0	2
phnL	yaaJ	0.57843	0	2
clpB	rep	0.57793	0	5
ygjD	ptsG	0.57785	0	0
dppD	rpsB	0.57701	0	7
holA	prfA	0.57691	0	2
dppD	tauC	0.57673	0	1
paaF	cca	0.57654	0	8
ygiT	hyfH	0.57578	0	1
ispD	ycgL	0.57569	0	8
yhbW	fdx	0.57463	0	3
mutH	fdhD	0.57418	0	5
mutY	yihN	0.57378	0	40
yoaB	gyrA	0.57049	0	3
ptsI	ycgX	0.57031	0	6
mukF	yahG	0.56878	0	7
yfbU	ydaQ	0.56742	0	2
ydiS	yfhR	0.56587	0	4
moaB	acpS	0.56563	0	0
yagB	yghD	0.56533	0	3
ribB	ygeW	0.56524	0	3
mdoH	yicL	0.5644	0	7
rnr	nuoN	0.56424	0	2
yjaB	rimL	0.56394	0	1
rpsT	ygcO	0.56321	0	8
lpxB	ybcN	0.56278	1	105
yoaB	mdoH	0.5624	0	1
entE	ydaV	0.56205	0	9
bglX	thrC	0.56025	0	1
yqcC	prfA	0.55998	0	1
tdcE	argE	0.55979	0	0
ybaZ	ybjQ	0.55947	0	4
yahE	puuA	0.5585	0	1
manY	cvpA	0.55771	0	2
yjcE	frr	0.55701	0	5
sixA	yfbK	0.55652	0	2
yheT	ylbG	0.55605	0	1
miaA	dsrB	0.55566	0	2
ybhP	rnc	0.55371	0	1
rumB	wzxE	0.55148	0	1
afuC	frvA	0.54968	0	1
yhbW	lepA	0.54844	0	3
yraP	ycbZ	0.54804	0	5
ygiL	hyfE	0.54696	0	3
glmS	nuoF	0.54662	0	3
mipA	dicC	0.54658	0	3
yjcS	ydfR	0.54604	0	2
dcm	prc	0.546	0	17
rbsB	metC	0.54575	0	4
folA	ypjC	0.54564	0	14
tyrA	intB	0.54548	0	3
yafM	mdh	0.5446	0	1
ydiA	fruA	0.54405	0	1
ubiE	yfbU	0.54382	0	3
ruvB	dinB	0.5428	0	13
yjbF	ynaA	0.54209	0	5
yfdX	mdtG	0.54135	0	3
dinF	mscL	0.54118	0	7
mrcB	ybdG	0.54102	0	1
ihfB	rybB	0.54068	0	11
pbl	ybfM	0.54014	0	0
ydcT	dacB	0.53947	0	36
tsf	rpsA	0.5377	0	5
torI	yhcF	0.53763	0	4
rhlB	yciA	0.5364	0	3
nuoE	rdgC	0.53617	0	5
rpoH	yecE	0.53513	0	4
mrp	prmB	0.53505	0	2
recA	sseA	0.53332	0	4
tsgA	ybiV	0.53314	0	2
fliZ	rmf	0.53275	0	14
mdh	yfiN	0.53196	0	1
dppD	recD	0.53191	0	14
yceA	yrbL	0.53055	0	7
aroF	seqA	0.53051	0	4
smtA	ylbA	0.53027	0	1
ompL	ydiS	0.52903	0	10
ygcN	pspB	0.52848	0	2
pnp	rmf	0.52664	0	6
fdoH	ygcI	0.52645	0	4
rhsA	ydhY	0.52582	0	4
moaD	pphB	0.52414	0	5
hcaT	phoA	0.5231	0	1
yeiP	ubiX	0.52275	0	1
nusB	ackA	0.52116	0	4
mhpT	tas	0.52082	0	2
ispU	pstC	0.51944	0	4
lamB	mazG	0.51741	0	4
acpS	kdpC	0.51719	0	1
yhbW	ycbR	0.51674	0	3
yagW	lysS	0.51652	0	3
ppa	mukF	0.5163	0	21
ybaK	rffM	0.51604	0	4
ubiA	yojI	0.51561	0	40
tatB	aqpZ	0.51453	0	61
rpe	yhjY	0.51385	0	11
hokE	hslU	0.51349	0	13
yiiG	napH	0.5127	0	0
narZ	smtA	0.51263	0	9
dipZ	xapA	0.51096	0	7
yjjI	ytfM	0.51045	0	2
yciK	ydeK	0.50926	0	10
menC	yehU	0.50885	0	6
ypjA	yidG	0.50854	0	0
yehP	ycjO	0.50643	0	3
mpl	ybjD	0.50583	1	13
ubiX	glpG	0.50522	0	3
yciC	rpoZ	0.5042	0	6
glgA	gltF	0.50407	0	3
mutY	yfcN	0.5036	0	2
metC	cyoC	0.50298	0	2
yaeJ	cedA	0.50129	0	4
gyrB	selD	0.50112	0	4
sohB	dcrB	0.50096	0	1
yahB	ygcL	0.50069	0	2
exuT	ppiC	0.50006	0	3
